1

2

3

4 Human cytomegalovirus tropism modulator UL148 interacts with SEL1L, a cellular factor  
5 that governs ER-associated degradation of the viral envelope glycoprotein, gO.

6

7

8 Christopher C. Nguyen,<sup>a</sup> Mohammed N. Siddiquey,<sup>a</sup> Hongbo Zhang,<sup>a</sup> and Jeremy P.

9 Kamil<sup>a, #</sup>

10

11 Department of Microbiology and Immunology, LSU Health Sciences Center, Shreveport,  
12 Louisiana, USA<sup>a</sup>

13

14

15 Running Head: ER-associated degradation of HCMV glycoprotein O

16

17 #Address correspondence to Jeremy P. Kamil, [jkamil@lsuhsc.edu](mailto:jkamil@lsuhsc.edu)

18 1501 Kings Highway, Shreveport, Louisiana 71103

19

20 **ABSTRACT.**

21 UL148 is a viral endoplasmic reticulum (ER)-resident glycoprotein that contributes to  
22 human cytomegalovirus (HCMV) cell tropism. The influence of UL148 on tropism  
23 correlates with its potential to promote the expression of glycoprotein O (gO), a viral  
24 envelope glycoprotein that participates in a heterotrimeric complex with glycoproteins H  
25 and L that is required for infectivity. In an effort to gain insight into mechanism, we used  
26 mass spectrometry to identify proteins that co-immunoprecipitate from infected cells  
27 with UL148. This approach led us to identify an interaction between UL148 and SEL1L,  
28 a factor that plays key roles in ER-associated degradation (ERAD). In pulse-chase  
29 experiments, gO was less stable in cells infected with a *UL148*-null mutant HCMV than  
30 during wild-type infection, suggesting a potential functional relevance for the interaction  
31 with SEL1L. To investigate whether UL148 regulates gO abundance by influencing  
32 ERAD, siRNA silencing of either SEL1L or its partner, Hrd1, was carried out in the  
33 context of infection. Knockdown of these ERAD factors strongly enhanced levels of gO,  
34 but not other viral glycoproteins, and the effect was amplified in the presence of UL148.  
35 Furthermore, pharmacological inhibition of ERAD showed similar results. Silencing of  
36 SEL1L during infection also stabilized an interaction of gO with the ER lectin OS-9,  
37 which likewise suggests that gO is an ERAD substrate. Taken together, our results  
38 identify an intriguing interaction of UL148 with the ERAD machinery, and demonstrate  
39 that gO behaves as a constitutive ERAD substrate during infection. These findings have  
40 implications for understanding the regulation of HCMV cell tropism.

41 **IMPORTANCE.**

42 Viral glycoproteins in large part determine the cell types that an enveloped virus can  
43 infect, and hence play crucial roles in transmission and pathogenesis. The glycoprotein  
44 H/L heterodimer (gHgL) is part of the conserved membrane fusion machinery that all  
45 herpesviruses use to enter cells. In human cytomegalovirus, gHgL participates in  
46 alternative complexes in virions, one of which is a trimer of gHgL with glycoprotein O  
47 (gO). Here, we show that gO is constitutively degraded during infection by the  
48 endoplasmic reticulum-associated degradation (ERAD) pathway, and that UL148, a viral  
49 factor that regulates HCMV cell tropism, interacts with the ERAD machinery and slows  
50 gO decay. Since gO is required for cell-free virus to enter new host cells, but  
51 dispensable for cell-associated spread that resists antibody neutralization, our findings  
52 imply that the post-translational instability of a viral glycoprotein provides a basis for  
53 viral mechanisms to modulate tropism and spread.

54

55 **INTRODUCTION.**

56 Human cytomegalovirus (HCMV) is a  $\beta$ -herpesvirus that establishes life-long infection in  
57 the human host and causes significant morbidity and mortality in immunocompromised  
58 patients. The virus exhibits a remarkably broad cell tropism, infecting a wide array of cell  
59 types that include epithelial cells, endothelial cells, fibroblasts, smooth muscle cells,  
60 hepatocytes, leukocytes, and hematopoietic cells [reviewed in (1, 2)]. Primary infection  
61 is thought to commence with viral replication in mucosal epithelia. The virus then  
62 transfers to circulating leukocytes to establish latent infection in hematopoietic  
63 progenitor cells (3-5). For horizontal transmission, HCMV productively infects the  
64 epithelium of several secretory tissues, allowing for the release of virus into bodily fluids  
65 including saliva, breastmilk, and urine (2, 6).

66 HCMV expresses two alternative envelope glycoprotein H / glycoprotein L (gHgL)  
67 complexes that impact its cell tropism: gHgLgO (“trimer”) and gHgL/UL128-UL130-  
68 UL131 (“pentamer”) [reviewed in (7)]. Although the pentamer is dispensable for infection  
69 of fibroblasts, it is required to infect epithelial cells, endothelial cells, and leukocytes (8-  
70 10). Recently, Murrell *et al.* showed that the pentamer promotes cell-to-cell spread that  
71 is resistant to antibody neutralization (11). On the other hand, the trimer appears to be  
72 essential for the infectivity of cell-free HCMV virions, since *gO*-null mutant viruses are  
73 defective for entry into all cell types (12, 13). While the platelet-derived growth factor  
74 receptor alpha has been identified as a cellular receptor for the trimer that is required for  
75 infection of fibroblasts (14-16), pentamer receptor(s) remain to be demonstrated.  
76 Evidence from the murine cytomegalovirus (MCMV) *in vivo* infection model suggests



77 that the MCMV ortholog of the HCMV trimer (gHgL with m74) promotes initial infection  
78 of tissues via a cell-free route but is dispensable for subsequent intratissue spread (17).  
79 While these and other studies have significantly advanced the understanding of HCMV  
80 envelope glycoprotein complexes involved in cell-type specific entry, the mechanisms  
81 driving production of virions with distinct glycoprotein profiles remain unclear, despite  
82 previous reports that imply that such mechanisms exist (18, 19).

83 In 2015, we reported the identification of a viral regulator of HCMV envelope  
84 gH/gL complexes encoded by the *UL148* gene (20). Disruption of *UL148* in strain  
85 TB40/E led to markedly enhanced tropism for epithelial cells accompanied by reduced  
86 levels of trimer on virions, and an overall reduction in virion levels of gHgL. These  
87 findings, together with results from two studies by Zhou et al. (21, 22), imply that HCMV  
88 cell tropism might be influenced by the ratio of pentamer-to-trimer in the viral envelope,  
89 and/or by the overall amount of gH complexes in virions. Although our previous work  
90 suggested that *UL148* increases the amount of trimer that matures beyond the  
91 endoplasmic reticulum (ER) to the post-Golgi compartments where virions acquire their  
92 infectious envelopes, the molecular details have remained unknown. *UL148* localizes  
93 exclusively to the ER, and *UL74* (gO) transcript levels were unaffected by disruption of  
94 *UL148* (20). Hence, it seems likely that *UL148* acts within the ER to either stabilize gO  
95 or promote assembly of the trimer. To gain more detailed information concerning  
96 potential mechanisms, we embarked to identify proteins that interact with *UL148* during  
97 infection. Here, we show that *UL148* interacts with SEL1L, a core element of the  
98 cellular ER-associated degradation (ERAD) pathway. Furthermore, results of

99 experiments carried out to address the functional relevance of the interaction reveal that  
100 gO behaves as a constitutive ERAD substrate during HCMV infection.

101

## 102 **RESULTS**

### 103 **HCMV tropism factor UL148 physically associates with the ERAD adapter SEL1L**

104 **during infection.** To investigate the mechanism by which UL148 promotes gO  
105 expression, we sought to identify its interaction partners. To this end, we infected  
106 primary human foreskin fibroblasts (HFF) with a recombinant HCMV strain TB40/E that  
107 expresses an HA-epitope tagged UL148 (TB\_148<sup>HA</sup>). A parallel infection was  
108 conducted using a control virus, TB\_16<sup>HA</sup>, which expresses HA-tagged UL16. Like  
109 UL148, UL16 is an ER resident glycoprotein with type I transmembrane topology (23).  
110 Infected cells were harvested for anti-HA immunoprecipitation (IP) at 72 h post infection  
111 (hpi). After resolving eluates by SDS-PAGE, we excised silver-stained bands for protein  
112 identification by mass spectrometry (MS) analysis (Fig. 1A). The full list of cellular  
113 proteins identified from IPs of TB\_148<sup>HA</sup> infections in two independent experiments, but  
114 not from IPs of TB\_16<sup>HA</sup>, is shown in Table S1. We were intrigued to observe peptides  
115 that mapped to factors in the ERAD pathway, including SEL1L, XTP3-B, and OS-9.

116 Although co-IP experiments failed to validate several of the putative hits (not  
117 shown), we found evidence that suggested a physical association between UL148 and  
118 SEL1L (Fig. 1). Results of co-IP experiments from HCMV infected fibroblasts (Fig. 1B),  
119 and from plasmid transfected 293T cells (Fig. 1C) supported the possibility that UL148  
120 associates with endogenous SEL1L. HCMV US11, a viral immune-evasin that was

121 included as a positive control known to interact with SEL1L (24), was readily detected in  
122 anti-SEL1L IPs, as was UL148. However, detection of SEL1L was less pronounced  
123 following IP of HA-tagged US11 than following IP of HA-tagged UL148, which may  
124 indicate a more robust interaction with UL148. UL16 and SEL1L were found to co-IP  
125 each other poorly or undetectably, consistent with the negative result from infected cells  
126 (Fig. 1B-1C). From these results, we concluded that UL148 may physically associate  
127 with SEL1L, or with a protein complex that contains it.

128

### 129 **Pulse-chase analysis of gO during WT- and *UL148*-null HCMV infection.**

130 SEL1L plays key roles in the degradation of misfolded ER proteins [reviewed in  
131 (25, 26)]. In the canonical ERAD pathway, SEL1L acts as an adapter between the ER  
132 lectins OS-9 and XTP3-B and the Hrd1 complex (27), of which SEL1L is a stable  
133 component (28, 29). The ER lectins are posited to deliver terminally misfolded  
134 glycoproteins to the SEL1L-Hrd1 complex, which mediates ubiquitination and  
135 translocation of ERAD substrates to the cytosol for proteasomal degradation (27). Given  
136 that UL148 is required for high level expression of gO during infection (20) and appears  
137 to physically associate with SEL1L (Fig. 1), we sought to determine (i) whether the  
138 ERAD pathway targets gO for degradation and (ii) whether UL148 limits degradation of  
139 gO.

140 We therefore carried out pulse-chase experiments to compare gO stability  
141 between WT and *UL148*-null HCMV infected cells, using recombinant viruses that  
142 express an S-peptide tag at the C-terminus of gO in a manner that avoids disruption of

143 the overlapping *UL73* gene encoding gN (Fig. S1A). Importantly, the *UL148*-null mutant  
144 virus used herein, which carries nonsense codons in *UL148*, phenocopied the  
145 enhanced epithelial cell tropism of the previously characterized *UL148* deletion mutant  
146 (20) (Fig. S2). Further, incorporation of the S-tag, which allows for S-affinity purification  
147 (S-AP) of gO during pulse-chase experiments, had no effect on viral replication kinetics  
148 even during low MOI infection (Fig. S1B). To visualize the global stability of gO, and to  
149 discriminate between immature and mature gO glycoforms, we subjected S-AP eluates  
150 to PNGase F and endoglycosidase H (endoH) digestion, respectively. After resolving S-  
151 AP eluates by SDS-PAGE following pulse-chase and subjecting dried gels to  
152 autoradiography, we quantified the ~55 kD bands that corresponded to  
153 endoglycosidase-digested gO (Fig. 2).

154 Notably, we found that gO decayed approximately 2-fold more rapidly during  
155 infection with the *UL148*-null virus, TB\_148<sub>STOP</sub>\_gO-S (Fig. 2, “norm” signal in both  
156 endoH and PNGase F treatments). We also observed that infections with the wild-type  
157 (WT) comparator virus, TB\_gO-S, exhibited higher absolute levels of labeled gO than  
158 TB\_148<sub>STOP</sub>\_gO-S (Fig. 2, “abs” signal), even at the earliest chase time point (0 h).  
159 Weaker baseline signals for ERAD substrates have also been observed by others  
160 during conditions of more rapid decay, e.g. (30). We thus interpreted these results to  
161 indicate that gO undergoes accelerated ERAD in the absence of UL148.

162

163 **Knockdown of SEL1L leads to an increase in steady-state gO levels.**

164 We next sought to investigate whether gO is subjected to SEL1L-dependent  
165 ERAD during HCMV infection. To deplete cells of SEL1L, we transfected cells with  
166 siRNA pools targeting *SEL1L*, and then infected with either wild-type (TB\_WT) or  
167 *UL148*-null mutant (TB\_148<sub>STOP</sub>) HCMV strain TB40/E viruses. Depletion of SEL1L led  
168 to a robust increase in steady-state gO levels, while levels of other viral proteins such  
169 as pp150 and UL44 were found to be decreased or unaffected (Fig. 3). SEL1L  
170 knockdown likewise failed to stabilize any of the other three viral glycoproteins whose  
171 expression we monitored, gB, gH, and gL, and instead appeared to decrease their  
172 expression (Fig. 3). The observed decrease in levels of other viral gene products may  
173 due to the unfolded protein response (UPR), which can be activated during SEL1L  
174 depletion (31). Intriguingly, stabilization of gO in response to SEL1L siRNA treatment  
175 was more pronounced during WT virus infection than in the *UL148*-null setting.

176 Endoglycosidase H (EndoH) treatment, which removes N-linked glycans to cause  
177 ER glycoforms of gO to migrate as single species of  $M_r \sim 50$  kD, confirmed that the  
178 major immunoreactive bands we detected during SEL1L depletion were indeed gO, and  
179 also indicated that SEL1L knockdown stabilized endoH-sensitive ER forms of gO, as  
180 would be consistent with the interpretation that gO is an ERAD substrate (Fig. S3A).  
181 Similar results were also seen when S-tag antibodies were used to detect SEL1L  
182 knockdown stabilization of gO in TB\_gO-S infected cells (Fig. S3B). Arguing against  
183 the possibility that the effects of SEL1L depletion on gO levels might be a strain-specific  
184 phenomena, we found similar results for the HCMV laboratory strain AD169 [which lost  
185 *UL148* and several other viral genes during tissue culture adaptation (32)], and as was

186 the case in WT vs. *UL148*-null TB40/E, we likewise observed amplified gO stabilization  
187 for an AD169 derivative restored for *UL148* (Fig. S4). Finally, siRNA knockdown of the  
188 SEL1L partner protein, the E3 ubiquitin ligase Hrd1, led to increased gO levels, as  
189 would be expected based on the effects of SEL1L knockdown (Fig. S5). We interpreted  
190 these results to strongly suggest that gO is a constitutive ERAD substrate during HCMV  
191 infection.

192

193 **Kifunensine treatment increases steady-state gO levels.** We next tested whether  
194 pharmacological inhibition of ERAD would similarly stabilize gO. Kifunensine (KIF) is a  
195 potent inhibitor of ER mannosidase I (33), which demannosylates the N-linked glycans  
196 on misfolded glycoproteins to target them for recognition by ER lectins such as OS-9  
197 and XTPB-3, which in turn deliver the misfolded glycoproteins to the SEL1L-Hrd1  
198 complex for ERAD [(27), reviewed in (26)]. After treating HCMV-infected fibroblasts  
199 with KIF at 72 hpi and harvesting lysates at 96 hpi, we observed a robust, dose-  
200 dependent increase in the abundance of an intermediate-size gO glycoform that  
201 migrated at ~90 kD SDS-PAGE (Fig. 4, Fig. S6). Furthermore, as in the SEL1L and  
202 Hrd1 knockdown experiments, the presence of *UL148* appeared to further enhance gO  
203 levels in both control and KIF-treated cells. In contrast to SEL1L depletion, however, we  
204 observed no significant decrease in levels of gH or gB after KIF treatment, suggesting  
205 that KIF may be less toxic to infected cells than siRNA depletion of SEL1L or Hrd1.  
206 These results further suggested to us that gO is a constitutive ERAD substrate during  
207 infection.

208

209 **Pulse-chase analysis of gO during SEL1L and Hrd1 depletion.**

210 To evaluate how blockade of ERAD would affect gO decay in the presence versus the  
211 absence of UL148, we carried out pulse-chase experiments in fibroblasts that were  
212 siRNA depleted for SEL1L or Hrd1 and subsequently infected with WT or *UL148*-null  
213 viruses expressing S-tagged gO. To fully resolve gO from gH, we subjected S-AP  
214 eluates to PNGase F digestion. As expected, gO decayed more slowly during  
215 knockdown of either SEL1L or Hrd1 compared to non-targeting control (NTC)  
216 conditions, regardless of whether UL148 was present (Fig. 5A-B). Absolute levels of gO,  
217 however, were most markedly amplified—by up to 7-fold at the 4 h chase time point,  
218 when knockdown of either Hrd1, or to a lesser extent, SEL1L, occurred in presence of  
219 UL148 (Fig. 5B). The remarkable degree of gO stabilization during Hrd1 siRNA  
220 treatment made the roughly 2- to 3-fold effect of UL148 on gO stability, as seen in NTC  
221 treatments at 4 h post chase, appear modest by comparison (Fig. 5A-B). The  
222 observation that UL148 appeared to amplify stabilization of gO during ERAD blockade  
223 may suggest that UL148 acts upstream of Hrd1/SEL1L. Alternatively, this effect may  
224 simply reflect that substantial amounts of gO are still getting degraded by residual levels  
225 of SEL1L/Hrd1, despite efficient siRNA knockdown (Figs. 3, S4, S5), and that these  
226 residual levels of ERAD are readily squelched by UL148, which would be present at  
227 higher ratio to Hrd1 during the siRNA treatment. The latter possibility would be  
228 consistent with a functional relevance for the SEL1L interaction. Overall, these data  
229 corroborate the hypothesis that gO is targeted by ERAD during infection, and depending

230 on the interpretation, might be taken to suggest that UL148 functions to inhibit ERAD of  
231 gO.

232

233 **Knockdown of SEL1L stabilizes an association between gO and the ER lectin OS-**  
234 **9.**

235 As a final complementary approach to verify whether gO behaves as an ERAD  
236 substrate during infection, we asked whether gO associates with an ER lectin involved  
237 in upstream events during ERAD. Depletion of SEL1L is known to stabilize what is  
238 otherwise a transient association of the ER lectin OS-9 with ERAD substrates (27). We  
239 thus tested whether gO associates with OS-9 during knockdown of SEL1L in the context  
240 of the HCMV infected cell. We failed to observe co-purification of OS-9 with S-tagged  
241 gO from infected cells that were treated with non-targeting control siRNA (NTC) (Fig. 5).  
242 In contrast, we repeatedly detected co-purification of OS-9 with gO-S from infected cells  
243 that were knocked down for SEL1L (e.g., Fig. 5). Furthermore, gB failed to co-IP OS-9  
244 during either NTC or SEL1L knockdown, further arguing that the association that we  
245 detected between OS-9 and gO is specific. That we were able to detect co-purification  
246 of endogenous OS-9 with a putative ERAD substrate is notable. To our knowledge,  
247 recovery of detectable levels of endogenous OS-9 in this type of experiment has been  
248 observed only in one other study (34); most studies using this approach have relied  
249 upon OS-9 over-expression to enhance the sensitivity of the assay (27, 31, 35, 36).  
250 Overall, we interpreted this result to suggest that a physical association occurs between



251 gO and OS-9 during HCMV infection, which further argues that gO is an ERAD  
252 substrate.

## 253 **DISCUSSION**

254           Despite that this study was initiated to address the mechanisms underlying the  
255 influence of UL148 on trimer (gHgLgO) expression, one of the most striking findings is  
256 the unexpectedly large role for ERAD in regulating gO expression. Newly synthesized  
257 gO appears to be very unstable within the ER, much more so than other viral  
258 glycoproteins, as we did not find that pharmacologic or siRNA mediated inhibition of  
259 ERAD to stabilize any other viral glycoproteins. In fact, siRNA knockdown of either  
260 SEL1L or Hrd1 each led to decreased expression of gH, gL, and gB (Fig. 3) but  
261 amplified gO levels by up to 7-fold (Fig. 5B). Although the literature also suggests the  
262 existence of post-ER processes that regulate virion incorporation of gHgL complexes  
263 (37), because gO participates in alternative gHgL complexes that contribute to HCMV  
264 cell tropism, our findings underscore the large potential for ERAD to sculpt the  
265 glycoprotein composition of the virion envelope, and hence, to influence the infectivity of  
266 HCMV for different cell types.

267

268 **Why would gO be an ERAD substrate?** gO is a heavily glycosylated protein, with at  
269 least half of its ~100 kD molecular mass derived from N-linked glycans. Although the  
270 exact number varies between HCMV strains, its primary amino acid sequence contains  
271 approximately 20 N-x-(S/T) sequons that might serve as sites for N-linked glycosylation.  
272 Such a large degree of glycosylation may serve a number of purposes. For instance,  
273 gO also been reported to attenuate antibody-mediated neutralization of gH and gB (38).  
274 Hence, analogous to the “glycan shield” provided by gp120 in HIV (39), extensive

275 glycosylation may contribute to the capacity of gO to protect the viral fusion machinery  
276 from neutralizing antibodies. However, given the roles that N-linked glycans play in  
277 glycoprotein quality control (26), the heavy degree of glycosylation may also predispose  
278 gO to be especially susceptible to ERAD targeting by ER mannosidases.

279         Additionally, inefficient folding may be an inherent property of the gO polypeptide.  
280 Previous pulse-chase studies have shown that gH forms a complex with gL within 30  
281 min of its de novo synthesis, but that assembly of gHgLgO does not occur until  
282 approximately 2 h (40). This observation may imply that folding of gO occurs slowly and  
283 may be rate limiting for trimer assembly. Moreover, because gO must assemble into  
284 trimer in order to traffic further through the secretory pathway, the relatively slow  
285 kinetics of trimer assembly might compel a certain degree of constitutive degradation.  
286 Indeed, orphan subunits of multisubunit complexes, such as the T-cell receptor, are  
287 retained in the ER and destroyed via ERAD (41, 42). Competition with the pentamer-  
288 specific subunits UL128, UL130 and UL131 for assembly onto gHgL (9, 43-45) may  
289 further increase levels of unassembled gO that would be targeted for disposal. Accordingly,  
290 upon repair of pentamer expression to HCMV strain AD169, Wang and Shenk showed  
291 decreased amounts of gO co-immunoprecipitated with gH [(9), Fig. 1C], and Zhou *et al.*  
292 found transcriptional suppression of the *UL128* locus to increase levels of gHgLgO in  
293 virions (21). It thus seems likely that both of these mechanisms, intrinsic instability and  
294 inefficient trimer assembly, may contribute to limiting trimer expression during HCMV  
295 infection.

296 Notably, we find that the homologs of gO from murine cytomegalovirus (MCMV)  
297 and rhesus cytomegalovirus also appear to be stabilized in infected cells during  
298 treatment with ERAD inhibitors or SEL1L knockdown (Zhang, H and Kamil, JP;  
299 unpublished results). Therefore, constitutive ERAD of gO homologs may prove to be a  
300 conserved feature among  $\beta$ -herpesviruses. Since the expression of alternative gHgL  
301 complexes is also shared across the  $\beta$ -herpesvirus subfamily, the intrinsic instability of  
302 gO and its homologs could provide a basis for mechanisms to modulate the composition  
303 of alternative gHgL complexes in a cell-type specific manner.

304

305 **How does UL148 influence ERAD of gHgLgO?** Our results suggest that gO is  
306 targeted by ERAD during infection, and that UL148 limits its degradation, with  
307 implications for HCMV cell tropism that are summarized in our model (Fig. 7). UL148  
308 could accomplish its effects on gO by at least two distinct but related mechanisms: (i) by  
309 promoting the folding and/or assembly of gO into mature trimer complexes, thereby  
310 preventing gO from being shunted to ERAD, or (ii) by dampening the ERAD pathway  
311 generally, perhaps through an interaction with SEL1L. The first mechanism would be  
312 consistent with our previous data suggesting that UL148 interacts with immature gHgL  
313 complexes during their transit through the ER (20). Although we cannot yet exclude the  
314 second possibility, determining whether UL148 stabilizes classical ERAD substrates is a  
315 foremost experimental priority. Moreover, the two mechanisms are not mutually  
316 exclusive. For instance, UL148 may bind to the gHgL dimer and inhibit the ERAD  
317 machinery to allow time for gO to assemble onto the complex. Interestingly, we

318 consistently observed a UL148-dependent increase in the absolute levels of gO,  
319 whether or not ERAD was disrupted, which might be taken to favor the possibility that  
320 UL148 enhances gO levels via mechanisms upstream of ERAD. On the other hand, the  
321 observation of enhanced gO stabilization when UL148 is present during ERAD blockade  
322 may simply reflect an influence of UL148 against the residual levels of ERAD that  
323 remain after siRNA- or pharmacologic disruption.

324

325 **Implications of gO instability and trimer regulation by UL148.** Tissue culture models  
326 have consistently demonstrated the importance of gHgLgO for infection of several cell  
327 types (12, 13, 22). However, *in vivo* studies using MCMV suggest that while the  
328 analogous complex of m74 with gHgL is required for initial infection of tissues by cell-  
329 free virions, it is dispensable for subsequent intra-tissue spread (17). By analogy, it  
330 seems plausible that *in vivo* most HCMV-infected cells constitutively degrade gO to  
331 promote “immunologically covert” cell-associated modes of virus spread that are driven  
332 by the pentameric gHgL complex (11), thereby mimicking the *UL148*-null phenotype  
333 shown in our model (Fig. 7). In cell types relevant for horizontal spread, however,  
334 UL148 expression or activity may be enhanced to promote higher levels of gO, as would  
335 be consistent with previous reports suggesting that the type of cell producing virions  
336 influences the processing of virion components and virion assembly to yield distinct  
337 virus populations (18, 19). In support of this notion, the repaired HCMV strain Merlin  
338 (46)—which is thought to recapitulate features of HCMV that are rapidly lost during  
339 adaptation to growth in cultured cells, and which expresses trimer very poorly, is found

340 to express UL148 at much lower levels than a HCMV clinical strain known to express  
341 high levels of trimer (47). Given that HCMV is highly cell-associated *in vivo* (2), it is  
342 intriguing to consider that UL148 abundance might be regulated so that trimer-rich  
343 virions are produced only in settings such as glandular or ductal epithelial cells where  
344 production of cell-free virions would be necessary for horizontal spread.

345

## 346 **MATERIALS AND METHODS.**

347 **Cells.** Human foreskin fibroblasts (HFF) were immortalized by transducing primary  
348 HFFs (ATCC #SCRC-1041) with lentivirus encoding human telomerase (hTERT) to  
349 yield HFFT cells (see below). 293T cells were purchased from Genhunter Corp.  
350 (Nashville, TN). ARPE-19 retinal pigment epithelial cells were purchased from ATCC  
351 (CRL-2302). All cells were cultured in Dulbecco's Modified Eagle's Medium (DMEM,  
352 Corning) supplemented with 25 µg/mL gentamicin (Invitrogen), 10 µg/mL ciprofloxacin  
353 (Genhunter), and either 5% fetal bovine serum (FBS, Sigma #F2442) or 5% newborn  
354 calf serum (NCS, Sigma #N4637).

355 **Viruses.** Virus was reconstituted by electroporation of HCMV bacterial artificial  
356 chromosomes (BACs) into HFFTs, as described previously (20, 48). HCMV strain  
357 AD169rv repaired for *UL131* (ADr131) (20) and recombinants derived from it were  
358 amplified at low MOI on ARPE-19 cells until 100% cytopathic effect (CPE) was  
359 observed. Virus-containing culture supernatants were then subjected to centrifugation  
360 (1000g) for 10 minutes to pellet any cellular debris. The supernatant was then  
361 ultracentrifuged (85,000g, 1 h, 4°C) through a 20% sorbitol cushion, and the resulting

362 virus pellet was resuspended in DMEM containing 20% NCS. For TB40/E and related  
363 recombinants, virus was grown on HFFTs until 100% CPE was observed. Cell-  
364 associated virus was then released by Dounce-homogenization of pelleted infected  
365 cells, clarified of cell debris by centrifugation (1000g, 10 min), and combined with the  
366 cell-free medium before ultracentrifugation and resuspension as above.

367 **Virus titration.** Infectivity of virus stocks and samples were determined by the tissue  
368 culture infectious dose 50% (TCID<sub>50</sub>) assay. Briefly, serial dilutions of virus were used to  
369 infect multiple wells of a 96-well plate. After 9 days, wells were scored as positive or  
370 negative for CPE, and TCID<sub>50</sub> values were calculated according to the Spearman-  
371 Kärber method (49, 50).

372 **Virus growth kinetics.** For viral yield on fibroblasts (HFFT) vs ARPE-19 epithelial cells  
373 (Fig. S1), cells were seeded in a 24-well plate at  $6.5 \times 10^4$  cells per well. For multi-cycle  
374 growth kinetics of TB\_gO-S (Fig. S3), HFFT were seeded at  $1.5 \times 10^5$  cells per well.  
375 Wells were then infected in duplicate at the indicated MOIs in 0.3 mL per well, and  
376 back-titration of the inocula was initiated in parallel. Inocula were removed after 16 hr,  
377 and the cells were washed three times with 1 mL of Dulbecco's phosphate-buffered  
378 saline (DPBS, Lonza Biowhittaker, Inc.). Cell-free supernatants were collected at  
379 indicated times post-infection and stored at -80°C until analysis. Infectivity titers  
380 (TCID<sub>50</sub>) were determined in parallel.

381 **Antibodies.** Mouse monoclonal antibodies (mAbs) specific for gH (AP86) (51), gB (27-  
382 156) (52), and pp150 (53) were generous gifts from William J. Britt (University of  
383 Alabama, Birmingham). Additional gB and UL44 mouse mAbs were purchased from

384 Virusys (#P1201 and #P1202-2). Rabbit antibodies were used to detect the following  
385 proteins: UL148 (20), SEL1L (Sigma #S3699), OS-9 (Cell Signaling Tech #12497), HA  
386 epitope tag: YPYDVPDYA (Bethyl #A190-108A), S-peptide: KETAAAKFERQHMD  
387 (Bethyl #A190-135A). Additional rabbit sera immunoreactive to gL, and to gO variants  
388 from HCMV strains TB40/E and AD169 were generous gifts from Brent J. Ryckman  
389 (University of Montana, Missoula, MT) (21).

390 **Construction of recombinant viruses.** Synthetic dsDNAs (gBlocks) and  
391 oligonucleotides were purchased from Integrated DNA Technologies (Coralville, IA); full  
392 sequence details are provided in Table S2. New recombinant HCMVs were constructed  
393 in the context of the infectious bacterial artificial chromosome (BAC) clones of HCMV  
394 strains TB40/E, TB40-BAC4 (54), and AD169, AD169rv (55), as previously described  
395 (20, 48, 56), with full details provided in Supplemental Text S1. Briefly, two-step Red  
396 “*en passant*” recombination (57, 58) was used in conjunction with GS1783 *E. coli* (a gift  
397 of Greg Smith, Northwestern University) harboring BAC-cloned HCMV genomes.  
398 Recombinant BACs were confirmed by Sanger-sequencing (Genewiz, Inc.) of modified  
399 loci (not shown), and by BamHI and EcoRI restriction analysis (not shown) to exclude  
400 spurious rearrangements.

401 *TB40/E* expressing *UL148<sup>HA</sup>* or *UL16<sup>HA</sup>*. TB\_148<sup>HA</sup> was described previously (20). Text  
402 S1 describes construction of recombinant TB\_UL16<sup>HA</sup>.

403 *UL148-null recombinant TB\_148<sub>STOP</sub>*. TB\_148<sub>STOP</sub> was constructed by replacement of  
404 the UL148 coding sequence (CDS) with a synthetic version in which all in-frame  
405 methionine codons were replaced with nonsense codons.



406 *TB40/E* and *TB\_148<sub>STOP</sub>* expressing *S*-tagged *gO*. To add a bovine pancreatic  
407 ribonuclease A S-peptide tag (S-tag) (59) (KETAAAKFERQHMS) to the *UL74* (*gO*)  
408 ORF without disrupting the overlapping gene, *UL73* (*gN*), a codon-optimized sequence  
409 encoding the following elements was inserted between nucleotides 139966 and 139967  
410 (numbering per Genbank Accession #EF2999921.1): (i) the 30 C-terminal amino acids  
411 of *gO*, (ii) triple (Gly-Gly-Gly-Ser) linker, and (iii) the S-tag, followed by a tandem pair of  
412 stop codons.

413 *ADr131* expressing *UL148<sup>HA</sup>*. Repair of *UL131* in strain AD169rv (*ADr131*) was  
414 described previously (20). *ADr131\_148* was constructed by replacing the vestigial  
415 *UL148* remnant with full-length *UL148* from HCMV strain *TB40/E*.

#### 416 **Plasmids.**

417 The construction of new plasmids for this study is described in Text S1.

418 **hTERT lentivirus production and transduction.** hTERT lentivirus was isolated and  
419 used to transduce HFF according to a modified version of the Addgene pLKO.1  
420 protocol, as described previously (48). See Text S1 for details.

421 **siRNA treatments.** siGenome SMARTpool siRNAs targeting SEL1L, Hrd1, and non-  
422 targeting control (NTC) siRNA were purchased from Dharmacon. Details are provided in  
423 Table S3. siRNAs were reverse-transfected into cells using Lipofectamine RNAiMAX  
424 reagent (Thermo Fisher) as per the manufacturer's instructions. Briefly, two mixes were  
425 prepared separately: Mix #1 was prepared by adding 30 pmol of siRNA to 150  $\mu$ L non-  
426 supplemented OptiMEM medium (Thermo Fisher) and gently mixing. Mix #2 was  
427 prepared by adding 9  $\mu$ L of RNAiMAX reagent to 150  $\mu$ L non-supplemented OptiMEM.

428 Mix #1 and #2 were then combined and immediately transferred to an empty well of a 6-  
429 well plate and incubated at room temperature for 5 min. Approximately 1.0 million cells  
430 were then added to the well in 2.2 mL of DMEM containing 5% NCS (10 nM siRNA  
431 final).

432 **Endoglycosidase H analysis.** EndoH digestion of 20  $\mu$ g total protein was performed  
433 according to the manufacturer's instructions (New England Biolabs).

434 **Pulse-chase.**  $4 \times 10^6$  HFFTs were infected at an MOI of 1 TCID<sub>50</sub> per cell with TB\_gO-  
435 S and TB\_148<sub>STOP</sub>\_gO-S. In experiments involving knockdown of SEL1L or Hrd1, the  
436 cells were first reverse-transfected with siRNAs targeting SEL1L, Hrd1, or NTC, as  
437 described above; at 8 hours post-transfection (hpt), the cells were washed with DPBS  
438 and infected as above. At 96 hpi, the cells were washed twice with 10 mL DPBS and  
439 incubated for 30 mins in 5 mL of Met/Cys starving medium [DMEM lacking Met, Cys,  
440 and Glu (Gibco #21013024) plus 2 mM glutamate and 5% dialyzed FBS (Sigma  
441 #F0392)]. Cells were then pulsed for 20 mins with 2 mL of starving medium plus 200  
442  $\mu$ Ci/mL <sup>35</sup>S-Met/Cys (PerkinElmer #NEG772). To quench radiolabeling, 6 mL of chase  
443 medium [DMEM (Corning #10013CV) plus 2 mM Met, 2 mM Cys, and 5% NCS] was  
444 added directly to each dish. At the indicated time-points, the chase medium was  
445 replaced with ice-cold PBS. Cells were scraped, pelleted (4000g for 1 min), and lysed in  
446 RIPA buffer containing 25 mM HEPES (pH 7.5), 400 mM NaCl, 0.1% SDS, 0.5%  
447 sodium deoxycholate, 1% NP-40, 1% bovine serum albumin (BSA), and 1X protease  
448 inhibitor cocktail (PIC, CST #5871). Lysis continued for 1 h (4°C with rotation), and

449 lysates were clarified of insoluble material by centrifugation (20,000g, 30 mins) and  
450 discarding of the pellet.

451 To quantify radiolabel incorporation into protein, 10  $\mu$ L of lysate was added to 1 mL of  
452 10% trichloroacetic acid (TCA) in triplicate, vortexed, and incubated on ice for 30 mins.

453 Lysate/TCA solution was pipetted onto a glass disk (Whatman #1821025), and the disk  
454 was washed with 10 mL ice-cold 10% TCA and 10 mL ice-cold 100% ethanol. Disks  
455 were air-dried for 30 mins and shaken overnight in 5 mL scintillation fluid (Fisher  
456 #SX12-4). Counts per minute (CPMs) were measured on a scintillation counter  
457 (Beckman LS 6500) and averaged across triplicates.

458 *S-protein affinity purification of radiolabeled gO.* Equal CPMs of lysate were combined  
459 with 30  $\mu$ L of S-protein agarose bead slurry (EMD Millipore) and RIPA buffer to a final  
460 volume of 400  $\mu$ L. S-AP mixes were rotated overnight at 4°C. Beads were pelleted  
461 (1500g, 5 mins) and washed twice with 400  $\mu$ L RIPA buffer containing 1% BSA, then  
462 washed twice with 400  $\mu$ L RIPA buffer without BSA.

463 *Endoglycosidase-digestion of S-AP eluates and autoradiography.* To more effectively  
464 resolve co-purified gO and gH during SDS-PAGE, S-AP eluates were first digested with  
465 either peptide:N-glycosidase F (PNGase F, NEB) or endoglycosidase H (Endo H, NEB)  
466 as follows. After the final wash of S-AP above, the beads were boiled (85°C, 5 min) in  
467 1X glycoprotein denaturing buffer, chilled on ice, then incubated with PNGase F or Endo  
468 H digestion mix (final volume 21  $\mu$ L, 37°C, 1 h) according to the manufacturer's  
469 instructions. 10  $\mu$ L of 4X Laemmli buffer containing 20%  $\beta$ -mercaptoethanol (BME) was  
470 added to each sample, followed by boiling (85°C, 5 mins). Samples were resolved by

471 sodium dodecyl sulfate-polyacrylamide gel electrophoresis (SDS-PAGE), as described  
472 previously (48). Gels were dried using a Bio-Rad Model 583 Gel Dryer, and radioactive  
473 signal was captured on a storage phosphor screen for a minimum of 72 h prior to data  
474 acquisition on Bio-Rad Molecular Imager FX. Band intensities were quantified using  
475 Quantity One 1-D Analysis Software (Bio-Rad). In brief, volume rectangles were drawn  
476 closely around the 55 kD gO band to generate a report of adjusted volume (CNT\*mm<sup>2</sup>)  
477 values after local background subtraction. These values were normalized and reported  
478 as “gO signal”.

479 **Mass spectrometry.**  $2 \times 10^7$  fibroblasts (HFF) were infected at an MOI of 1 TCID<sub>50</sub> per  
480 cell with TB\_148<sup>HA</sup>. Cells were lysed at 120 hpi in modified RIPA lysis buffer [50 mM  
481 HEPES (pH 7.5), 1% TritonX-100, 400 mM NaCl, 0.5% sodium deoxycholate, 10%  
482 glycerol, and 1X PIC]. Anti-HA magnetic beads (Pierce #8837) were incubated (rotation  
483 overnight, 4°C) with lysates plus 100 µg/mL BSA, washed three times with lysis buffer,  
484 and eluted by boiling in Laemmli buffer (65°C, 5 min). Eluate was resolved by SDS-  
485 PAGE, and the gel was silver-stained according to the manufacturer’s protocol  
486 (ThermoFisher #24600). Silver-stained bands were excised from SDS-PAGE gels and  
487 sent to the Taplin Biological Mass Spectrometry Facility at Harvard Medical School  
488 (Boston, MA). Processing of gel slices for trypsin digestion, and resolution of peptides  
489 by nano-scale capillary reverse-phase HPLC are described in SI Methods. Eluted  
490 peptides were subjected to electrospray ionization and entered an LTQ Orbitrap Velos  
491 Pro ion-trap mass spectrometer (Thermo Fisher). Peptides were fragmented, and  
492 specific fragment ions were detected to generate a tandem pass spectrum for each

493 peptide. Each spectrum was matched to a fragmentation pattern database by the  
494 program Sequest (Thermo Fisher) to determine the sequence of each peptide and  
495 hence protein identity (60). All databases included forward and reverse versions of  
496 peptide sequences, and data was filtered on a 1-2% peptide false discovery rate.

497 **Immunoprecipitation from transfected cells.**

498  $5 \times 10^5$  293T cells were transfected with 2.5  $\mu\text{g}$  of pEF1 $\alpha$  V5 C vector (Invitrogen)  
499 encoding codon-optimized *US11<sup>HA</sup>*, *UL16<sup>HA</sup>*, or *UL148<sup>HA</sup>* using Mirus TransIT-2020  
500 (#MIR 5404) according to the manufacturer's instructions. At 48 hpt, cells were lysed in  
501 300  $\mu\text{L}$  of lysis buffer [50 mM HEPES (pH 7.5), 400 mM NaCl, 0.5% sodium  
502 deoxycholate, and 1X PIC]. 200  $\mu\text{L}$  of lysate was rotated overnight (4°C) with 25  $\mu\text{L}$  of  
503 anti-HA magnetic bead slurry (Pierce #8837). Beads were washed three times with lysis  
504 buffer and eluted by heating (50°C, 10 min) in 2X Laemmli buffer containing 5% (v/v)  
505 BME. Eluates and whole cell lysates were analyzed by western blot.

506 **OS-9 co-purification assay.**  $1 \times 10^6$  HFFT were reverse-transfected with siRNAs  
507 targeting SEL1L or NTC, as above. At 48 hpt, cells were infected with TB\_gO-S virus at  
508 an MOI of 1 TCID<sub>50</sub> per cell. At 96 hpi, cells were lysed in 50 mM HEPES (pH 7.5), 1%  
509 TritonX-100, 400 mM NaCl. Equal  $\mu\text{g}$  of protein (determined by Pierce BCA assay) were  
510 subjected to S-AP [30  $\mu\text{L}$  of S-protein agarose slurry] or glycoprotein B (gB)-IP [30  $\mu\text{L}$   
511 Protein G magnetic bead slurry (EMD Millipore) plus anti-gB mAb 27-156 (52)]. After  
512 overnight rotation (4°C), beads were washed three times with lysis buffer and eluted in  
513 1X Laemmli buffer plus 5% BME. Eluates and whole cell lysates were analyzed by  
514 western blot.

515

516

517 **ACKNOWLEDGMENTS**

518 This project was supported by NIH Grants R01-AI116851 and P30GM110703. Its  
519 contents are solely the responsibility of the authors and do not necessarily represent the  
520 official views of the funding agencies. C.C.N. was supported by a fellowship from the  
521 Center of Cardiovascular Diseases and Sciences at LSU Health Sciences Center –  
522 Shreveport. We thank William Britt, Brent Ryckman, Greg Smith, Christian Sinzger, and  
523 Ulrich Koszinowski for generously sharing reagents.  
524 Author contributions are as follows: C.C.N. performed the majority of experiments.  
525 C.C.N. and J.P.K. designed experiments, interpreted results, and wrote the manuscript.  
526 J.P.K. designed HCMV recombinants. M.N.S. constructed recombinant TB\_148<sub>STOP</sub>,  
527 performed UL148/SEL1L and gO/OS-9 co-purification studies, and prepared samples  
528 for MS analysis. H.Z. constructed recombinant viruses TB\_gO-S and TB\_148<sub>STOP</sub>\_gO-S  
529 and assisted with replication of virus yield experiments.

530

531

532 **FIG. 1. Viral tropism factor UL148 associates with ERAD adapter SEL1L during**  
533 **infection.** (A) Silver stain. Fibroblasts (HFF) infected with TB\_148HA were lysed at 72  
534 hpi and subjected to HA-IP. Visible silver-stained bands were excised and analyzed by  
535 mass spectrometry. The putative association between UL148 and SEL1L was  
536 confirmed by HA-IP and western blot of UL148HA complexes from (B) infected cells or  
537 (C) 293T cells transfected with plasmids expressing the indicated HCMV ER-resident  
538 proteins.

539

540 **FIG. 2. Pulse-chase analysis of gO during *UL148*-null HCMV infection.** Fibroblasts  
541 (HFFTs) were infected at an MOI of 1 TCID<sub>50</sub> per cell with TB40/E-derived recombinant  
542 TB\_gO-S expressing S-tagged gO (WT) or its *UL148*-null derivative, TB\_148<sub>STOP</sub>\_gO-S  
543 (148<sub>STOP</sub>). At 96 hpi, the cells were pulsed for 20 mins with 200  $\mu$ Ci/mL <sup>35</sup>S-Met/Cys and  
544 chased for the indicated times before lysis. Equal TCA-precipitable CPMs of each  
545 sample were subjected to S-AP, followed by endoglycosidase digestion and SDS-  
546 PAGE. The dried gel was exposed to a phosphor screen to produce an autoradiograph.  
547 The densities of the indicated gO bands (\*) were calculated and expressed either as  
548 absolute signal (“abs”) in relation to the WT/0 h band or as signal normalized (“norm”)  
549 across WT or *UL148*-null conditions relative to the respective 0 h band.

550

551 **FIG. 3. Depletion of SEL1L in HCMV-infected cells increases steady-state gO**  
552 **levels.** (A) Fibroblasts (HFFTs) were reverse-transfected with siRNA targeting SEL1L  
553 (SEL) or non-targeting control (NTC). At 48 h post transfection, the cells were infected

554 with HCMV strain TB40/E (WT) or its *UL148*-null derivative, TB\_148<sub>STOP</sub> (148<sub>STOP</sub>) at an  
555 MOI of 1 TCID<sub>50</sub> per cell. HCMV glycoprotein levels at 96 hpi were analyzed by western  
556 blot.

557

558 **FIG. 4. Treatment of HCMV-infected cells with an ERAD inhibitor increases**

559 **steady-state gO levels.** Fibroblasts (HFFTs) were infected at an MOI of 1 TCID<sub>50</sub> per

560 cell with TB\_gO-S (WT), TB\_148<sub>STOP</sub>\_gO-S (148<sub>STOP</sub>), or mock infection (M). Cells

561 were treated with kifunensine (KIF) at 2.5  $\mu$ M or carrier-alone (water) at 72 hpi. At 96

562 hpi, HCMV glycoprotein levels were analyzed by western blot.

563

564 **FIG. 5. Depletion of SEL1L or Hrd1 in HCMV-infected cells stabilizes gO during**

565 **WT and *UL148*-null infection.** Fibroblasts (HFFTs) were reverse-transfected with

566 siRNAs targeting (A) SEL1L or (B) Hrd1. At 6 hpt, the cells were infected at an MOI of 1

567 TCID<sub>50</sub> per cell with TB\_gO-S (WT) or TB\_148<sub>STOP</sub>\_gO-S (148<sub>STOP</sub>). At 96 hpi, the cells

568 were pulsed for 20 mins with 200  $\mu$ Ci/mL <sup>35</sup>S-Met/Cys and chased for the indicated

569 times before lysis. Equal TCA-precipitable CPMs of each sample were subjected to S-

570 AP, followed by PNGase F digestion to allow better resolution of gH and gO by SDS-

571 PAGE. The dried gel was exposed to a phosphor screen to produce an autoradiograph.

572 The densities of gO bands were calculated and expressed either as absolute signal

573 (“abs”) in relation to the WT/NTC/0 h band or as normalized signal (“norm”) for each

574 virus condition relative to the respective NTC/0 h band.

575



576 **FIG. 6. Depletion of SEL1L in HCMV-infected cells stabilizes a physical**  
577 **association between gO and ER lectin OS-9.** Fibroblasts (HFFTs) were reverse-  
578 transfected with siRNAs targeting SEL1L (SEL) or NTC. 48 h later, the cells were  
579 infected with TB\_gO-S at an MOI of 1 TCID<sub>50</sub> per cell. At 96 hpi, cell lysates were  
580 subjected to S-AP or gB-IP and analyzed by western blot.

581

582 **FIG. 7. Model.** HCMV gO, either through unfavorable folding or inefficient assembly  
583 onto gH/gL, is targeted for destruction by ERAD, which is mediated by SEL1L/Hrd1.  
584 UL148, perhaps through a functional interaction with SEL1L, slows the degradation of  
585 gO.

586

587

588 **SUPPLEMENTAL MATERIAL**

589 TEXT S1: Supplemental Methods and Supplementary Figure Legends.

590 FIG. S1: Construction and characterization of TB\_gO-S.

591 FIG. S2: Growth kinetics of TB\_148<sup>HA</sup> and TB\_148<sup>STOP</sup> on HFFT and ARPE-19 cells.

592 FIG. S3: EndoH analysis and detection of gO levels during SEL1L knockdown.

593 FIG. S4: Depletion of SEL1L in HCMV strain AD169-infected cells recapitulates effects  
594 on HCMV glycoproteins.

595 FIG. S5: Hrd1 depletion in HCMV-infected cells increases gO levels.

596 FIG. S6: Dose-responsive effect of kifunensine on HCMV gO levels.

597 TABLE S1: Mapping of peptide hits from UL148HA-IP eluates to human gene products.

598 TABLE S2: Synthetic DNAs used in the construction and sequence-confirmation of BAC  
599 recombinants and plasmids

600 TABLE S3: Dharmacon SMARTpool siRNA sequences used in this study.

## 1 REFERENCES

- 2 1. Sinzger C, Digel M, Jahn G. 2008. Cytomegalovirus cell tropism. *Curr Top Microbiol*  
3 *Immunol* 325:63-83.
- 4 2. Mocarski ES, Shenk T, Griffiths PD, Pass RF. 2013. Cytomegaloviruses, p 1960-2014.  
5 *In* Knipe DM, Howley PM (ed), *Fields' Virology*, 6th ed, vol 2. Wolters Kluwer  
6 Health/Lippincott Williams & Wilkins, Philadelphia.
- 7 3. Goodrum FD, Jordan CT, High K, Shenk T. 2002. Human cytomegalovirus gene  
8 expression during infection of primary hematopoietic progenitor cells: a model for  
9 latency. *Proc Natl Acad Sci U S A* 99:16255-60.
- 10 4. Maciejewski JP, Bruening EE, Donahue RE, Mocarski ES, Young NS, St Jeor SC. 1992.  
11 Infection of hematopoietic progenitor cells by human cytomegalovirus. *Blood*  
12 80:170-8.
- 13 5. Smith MS, Bentz GL, Alexander JS, Yurochko AD. 2004. Human cytomegalovirus  
14 induces monocyte differentiation and migration as a strategy for dissemination and  
15 persistence. *J Virol* 78:4444-53.
- 16 6. Cannon MJ, Hyde TB, Schmid DS. 2011. Review of cytomegalovirus shedding in  
17 bodily fluids and relevance to congenital cytomegalovirus infection. *Rev Med Virol*  
18 21:240-55.
- 19 7. Li G, Kamil JP. 2015. Viral Regulation of Cell Tropism in Human Cytomegalovirus. *J*  
20 *Virol* 90:626-9.
- 21 8. Wang D, Shenk T. 2005. Human cytomegalovirus UL131 open reading frame is  
22 required for epithelial cell tropism. *J Virol* 79:10330-8.
- 23 9. Wang D, Shenk T. 2005. Human cytomegalovirus virion protein complex required  
24 for epithelial and endothelial cell tropism. *Proc Natl Acad Sci U S A* 102:18153-8.
- 25 10. Hahn G, Revello MG, Patrone M, Percivalle E, Campanini G, Sarasini A, Wagner M,  
26 Gallina A, Milanese G, Koszinowski U, Baldanti F, Gerna G. 2004. Human  
27 cytomegalovirus UL131-128 genes are indispensable for virus growth in endothelial  
28 cells and virus transfer to leukocytes. *J Virol* 78:10023-33.
- 29 11. Murrell I, Bedford C, Ladell K, Miners KL, Price DA, Tomasec P, Wilkinson GWG,  
30 Stanton RJ. 2017. The pentameric complex drives immunologically covert cell-cell  
31 transmission of wild-type human cytomegalovirus. *Proc Natl Acad Sci U S A*  
32 114:6104-6109.
- 33 12. Jiang XJ, Adler B, Sampaio KL, Digel M, Jahn G, Ettischer N, Stierhof YD, Scrivano L,  
34 Koszinowski U, Mach M, Sinzger C. 2008. UL74 of human cytomegalovirus  
35 contributes to virus release by promoting secondary envelopment of virions. *J Virol*  
36 82:2802-12.
- 37 13. Wille PT, Knoche AJ, Nelson JA, Jarvis MA, Johnson DC. 2010. A human  
38 cytomegalovirus gO-null mutant fails to incorporate gH/gL into the virion envelope  
39 and is unable to enter fibroblasts and epithelial and endothelial cells. *J Virol*  
40 84:2585-96.
- 41 14. Kabanova A, Marcandalli J, Zhou T, Bianchi S, Baxa U, Tsybovsky Y, Lilleri D, Silacci-  
42 Fregni C, Foglierini M, Fernandez-Rodriguez BM, Druz A, Zhang B, Geiger R, Pagani  
43 M, Sallusto F, Kwong PD, Corti D, Lanzavecchia A, Perez L. 2016. Platelet-derived

- 44 growth factor-alpha receptor is the cellular receptor for human cytomegalovirus  
45 gH/gL/gO trimer. *Nat Microbiol* 1:16082.
- 46 15. Wu Y, Prager A, Boos S, Resch M, Brizic I, Mach M, Wildner S, Scrivano L, Adler B.  
47 2017. Human cytomegalovirus glycoprotein complex gH/gL/gO uses PDGFR-alpha  
48 as a key for entry. *PLoS Pathog* 13:e1006281.
- 49 16. Stegmann C, Hochdorfer D, Lieber D, Subramanian N, Stohr D, Laib Sampaio K,  
50 Sinzger C. 2017. A derivative of platelet-derived growth factor receptor alpha binds  
51 to the trimer of human cytomegalovirus and inhibits entry into fibroblasts and  
52 endothelial cells. *PLoS Pathog* 13:e1006273.
- 53 17. Lemmermann NA, Krmpotic A, Podlech J, Brizic I, Prager A, Adler H, Karbach A, Wu  
54 Y, Jonjic S, Reddehase MJ, Adler B. 2015. Non-redundant and redundant roles of  
55 cytomegalovirus gH/gL complexes in host organ entry and intra-tissue spread. *PLoS*  
56 *Pathog* 11:e1004640.
- 57 18. Patrone M, Secchi M, Fiorina L, Ierardi M, Milanesi G, Gallina A. 2005. Human  
58 cytomegalovirus UL130 protein promotes endothelial cell infection through a  
59 producer cell modification of the virion. *J Virol* 79:8361-73.
- 60 19. Scrivano L, Sinzger C, Nitschko H, Koszinowski UH, Adler B. 2011. HCMV spread and  
61 cell tropism are determined by distinct virus populations. *PLoS Pathog* 7:e1001256.
- 62 20. Li G, Nguyen CC, Ryckman BJ, Britt WJ, Kamil JP. 2015. A viral regulator of  
63 glycoprotein complexes contributes to human cytomegalovirus cell tropism. *Proc*  
64 *Natl Acad Sci U S A* 112:4471-6.
- 65 21. Zhou M, Yu Q, Wechsler A, Ryckman BJ. 2013. Comparative analysis of gO isoforms  
66 reveals that strains of human cytomegalovirus differ in the ratio of gH/gL/gO and  
67 gH/gL/UL128-131 in the virion envelope. *J Virol* 87:9680-90.
- 68 22. Zhou M, Lanchy JM, Ryckman BJ. 2015. Human Cytomegalovirus gH/gL/gO  
69 Promotes the Fusion Step of Entry into All Cell Types, whereas gH/gL/UL128-131  
70 Broadens Virus Tropism through a Distinct Mechanism. *J Virol* 89:8999-9009.
- 71 23. Dunn C, Chalupny NJ, Sutherland CL, Dosch S, Sivakumar PV, Johnson DC, Cosman D.  
72 2003. Human cytomegalovirus glycoprotein UL16 causes intracellular sequestration  
73 of NKG2D ligands, protecting against natural killer cell cytotoxicity. *J Exp Med*  
74 197:1427-39.
- 75 24. van de Weijer ML, Bassik MC, Luteijn RD, Voorburg CM, Lohuis MA, Kremmer E,  
76 Hoeben RC, LeProust EM, Chen S, Hoelen H, Rensing ME, Patena W, Weissman JS,  
77 McManus MT, Wiertz EJ, Lebbink RJ. 2014. A high-coverage shRNA screen identifies  
78 TMEM129 as an E3 ligase involved in ER-associated protein degradation. *Nat*  
79 *Commun* 5:3832.
- 80 25. Brodsky JL. 2012. Cleaning up: ER-associated degradation to the rescue. *Cell*  
81 151:1163-7.
- 82 26. Olzmann JA, Kopito RR, Christianson JC. 2013. The mammalian endoplasmic  
83 reticulum-associated degradation system. *Cold Spring Harb Perspect Biol* 5.
- 84 27. Christianson JC, Shaler TA, Tyler RE, Kopito RR. 2008. OS-9 and GRP94 deliver  
85 mutant alpha1-antitrypsin to the Hrd1-SEL1L ubiquitin ligase complex for ERAD.  
86 *Nat Cell Biol* 10:272-82.
- 87 28. Lilley BN, Ploegh HL. 2005. Multiprotein complexes that link dislocation,  
88 ubiquitination, and extraction of misfolded proteins from the endoplasmic reticulum  
89 membrane. *Proc Natl Acad Sci U S A* 102:14296-301.

- 90 29. Mueller B, Lilley BN, Ploegh HL. 2006. SEL1L, the homologue of yeast Hrd3p, is  
91 involved in protein dislocation from the mammalian ER. *J Cell Biol* 175:261-70.
- 92 30. Lilley BN, Ploegh HL. 2004. A membrane protein required for dislocation of  
93 misfolded proteins from the ER. *Nature* 429:834-40.
- 94 31. Alcock F, Swanton E. 2009. Mammalian OS-9 is upregulated in response to  
95 endoplasmic reticulum stress and facilitates ubiquitination of misfolded  
96 glycoproteins. *J Mol Biol* 385:1032-42.
- 97 32. Cha TA, Tom E, Kemble GW, Duke GM, Mocarski ES, Spaete RR. 1996. Human  
98 cytomegalovirus clinical isolates carry at least 19 genes not found in laboratory  
99 strains. *J Virol* 70:78-83.
- 100 33. Elbein AD, Tropea JE, Mitchell M, Kaushal GP. 1990. Kifunensine, a potent inhibitor  
101 of the glycoprotein processing mannosidase I. *J Biol Chem* 265:15599-605.
- 102 34. Bernasconi R, Galli C, Calanca V, Nakajima T, Molinari M. 2010. Stringent  
103 requirement for HRD1, SEL1L, and OS-9/XTP3-B for disposal of ERAD-LS substrates.  
104 *J Cell Biol* 188:223-35.
- 105 35. Hosokawa N, Kamiya Y, Kamiya D, Kato K, Nagata K. 2009. Human OS-9, a lectin  
106 required for glycoprotein endoplasmic reticulum-associated degradation,  
107 recognizes mannose-trimmed N-glycans. *J Biol Chem* 284:17061-8.
- 108 36. Ron E, Shenkman M, Groisman B, Izenshtein Y, Leitman J, Lederkremer GZ. 2011.  
109 Bypass of glycan-dependent glycoprotein delivery to ERAD by up-regulated EDEM1.  
110 *Mol Biol Cell* 22:3945-54.
- 111 37. Luginini A, Cavaletto N, Raimondo S, Geuna S, Gribaudo G. 2017. Loss of the Human  
112 Cytomegalovirus US16 Protein Abrogates Virus Entry into Endothelial and Epithelial  
113 Cells by Reducing the Virion Content of the Pentamer. *J Virol* 91.
- 114 38. Jiang XJ, Sampaio KL, Ettischer N, Stierhof YD, Jahn G, Kropff B, Mach M, Sinzger C.  
115 2011. UL74 of human cytomegalovirus reduces the inhibitory effect of gH-specific  
116 and gB-specific antibodies. *Arch Virol* 156:2145-55.
- 117 39. Wei X, Decker JM, Wang S, Hui H, Kappes JC, Wu X, Salazar-Gonzalez JF, Salazar MG,  
118 Kilby JM, Saag MS, Komarova NL, Nowak MA, Hahn BH, Kwong PD, Shaw GM. 2003.  
119 Antibody neutralization and escape by HIV-1. *Nature* 422:307-12.
- 120 40. Huber MT, Compton T. 1999. Intracellular formation and processing of the  
121 heterotrimeric gH-gL-gO (gCIII) glycoprotein envelope complex of human  
122 cytomegalovirus. *J Virol* 73:3886-92.
- 123 41. Yang M, Omura S, Bonifacino JS, Weissman AM. 1998. Novel aspects of degradation  
124 of T cell receptor subunits from the endoplasmic reticulum (ER) in T cells:  
125 importance of oligosaccharide processing, ubiquitination, and proteasome-  
126 dependent removal from ER membranes. *J Exp Med* 187:835-46.
- 127 42. Bonifacino JS, Suzuki CK, Lippincott-Schwartz J, Weissman AM, Klausner RD. 1989.  
128 Pre-Golgi degradation of newly synthesized T-cell antigen receptor chains: intrinsic  
129 sensitivity and the role of subunit assembly. *J Cell Biol* 109:73-83.
- 130 43. Chandramouli S, Malito E, Nguyen T, Luisi K, Donnarumma D, Xing Y, Norais N, Yu D,  
131 Carfi A. 2017. Structural basis for potent antibody-mediated neutralization of  
132 human cytomegalovirus. *Sci Immunol* 2.
- 133 44. Ciferri C, Chandramouli S, Donnarumma D, Nikitin PA, Cianfrocco MA, Gerrein R,  
134 Feire AL, Barnett SW, Lilja AE, Rappuoli R, Norais N, Settembre EC, Carfi A. 2015.

- 135 Structural and biochemical studies of HCMV gH/gL/gO and Pentamer reveal  
136 mutually exclusive cell entry complexes. *Proc Natl Acad Sci U S A* 112:1767-72.
- 137 45. Ryckman BJ, Rainish BL, Chase MC, Borton JA, Nelson JA, Jarvis MA, Johnson DC.  
138 2008. Characterization of the human cytomegalovirus gH/gL/UL128-131 complex  
139 that mediates entry into epithelial and endothelial cells. *Journal of Virology* 82:60-  
140 70.
- 141 46. Stanton RJ, Baluchova K, Dargan DJ, Cunningham C, Sheehy O, Seirafian S, McSharry  
142 BP, Neale ML, Davies JA, Tomasec P, Davison AJ, Wilkinson GW. 2010.  
143 Reconstruction of the complete human cytomegalovirus genome in a BAC reveals  
144 RL13 to be a potent inhibitor of replication. *J Clin Invest* 120:3191-208.
- 145 47. Zhang L, Zhou M, Stanton R, Kamil JP, Ryckman BJ. 2018. Expression levels of  
146 glycoprotein O (gO) vary between strains of human cytomegalovirus, influencing the  
147 assembly of gH/gL complexes and virion infectivity. *bioRxiv* doi:10.1101/299222.
- 148 48. Wang D, Li G, Schauflinger M, Nguyen CC, Hall ED, Yurochko AD, von Einem J, Kamil  
149 JP. 2013. The ULb' region of the human cytomegalovirus genome confers an  
150 increased requirement for the viral protein kinase UL97. *J Virol* 87:6359-76.
- 151 49. Kärber G. 1931. Beitrag zur kollektiven Behandlung pharmakologischer  
152 Reihenversuche. *Archiv f experiment Pathol u Pharmakol* 162: 480-483.
- 153 50. Spearman C. 1908. The Method of "Right and Wrong Cases" (Constant  
154 Stimuli) without Gauss's Formula. *Br J Psychol* 2:227-242
- 155 51. Urban M, Britt W, Mach M. 1992. The dominant linear neutralizing antibody-binding  
156 site of glycoprotein gp86 of human cytomegalovirus is strain specific. *J Virol*  
157 66:1303-11.
- 158 52. Spaete RR, Saxena A, Scott PI, Song GJ, Probert WS, Britt WJ, Gibson W, Rasmussen L,  
159 Pacht C. 1990. Sequence requirements for proteolytic processing of glycoprotein B  
160 of human cytomegalovirus strain Towne. *J Virol* 64:2922-31.
- 161 53. Sanchez V, Greis KD, Sztul E, Britt WJ. 2000. Accumulation of virion tegument and  
162 envelope proteins in a stable cytoplasmic compartment during human  
163 cytomegalovirus replication: characterization of a potential site of virus assembly. *J*  
164 *Virol* 74:975-86.
- 165 54. Sinzger C, Hahn G, Digel M, Katona R, Sampaio KL, Messerle M, Hengel H,  
166 Koszinowski U, Brune W, Adler B. 2008. Cloning and sequencing of a highly  
167 productive, endotheliotropic virus strain derived from human cytomegalovirus  
168 TB40/E. *J Gen Virol* 89:359-68.
- 169 55. Hobom U, Brune W, Messerle M, Hahn G, Koszinowski UH. 2000. Fast screening  
170 procedures for random transposon libraries of cloned herpesvirus genomes:  
171 mutational analysis of human cytomegalovirus envelope glycoprotein genes. *J Virol*  
172 74:7720-9.
- 173 56. Li G, Rak M, Nguyen CC, Umashankar M, Goodrum FD, Kamil JP. 2014. An epistatic  
174 relationship between the viral protein kinase UL97 and the UL133-UL138 latency  
175 locus during the human cytomegalovirus lytic cycle. *J Virol* 88:6047-60.
- 176 57. Tischer BK, Smith GA, Osterrieder N. 2010. En passant mutagenesis: a two step  
177 markerless red recombination system. *Methods Mol Biol* 634:421-30.
- 178 58. Tischer BK, von Einem J, Kaufer B, Osterrieder N. 2006. Two-step red-mediated  
179 recombination for versatile high-efficiency markerless DNA manipulation in  
180 *Escherichia coli*. *Biotechniques* 40:191-7.

- 181 59. Richards FM, Vithayathil PJ. 1959. The preparation of subtilisin-modified  
182 ribonuclease and the separation of the peptide and protein components. J Biol Chem  
183 234:1459-65.
- 184 60. Eng JK, McCormack AL, Yates JR. 1994. An approach to correlate tandem mass  
185 spectral data of peptides with amino acid sequences in a protein database. J Am Soc  
186 Mass Spectrom 5:976-89.
- 187



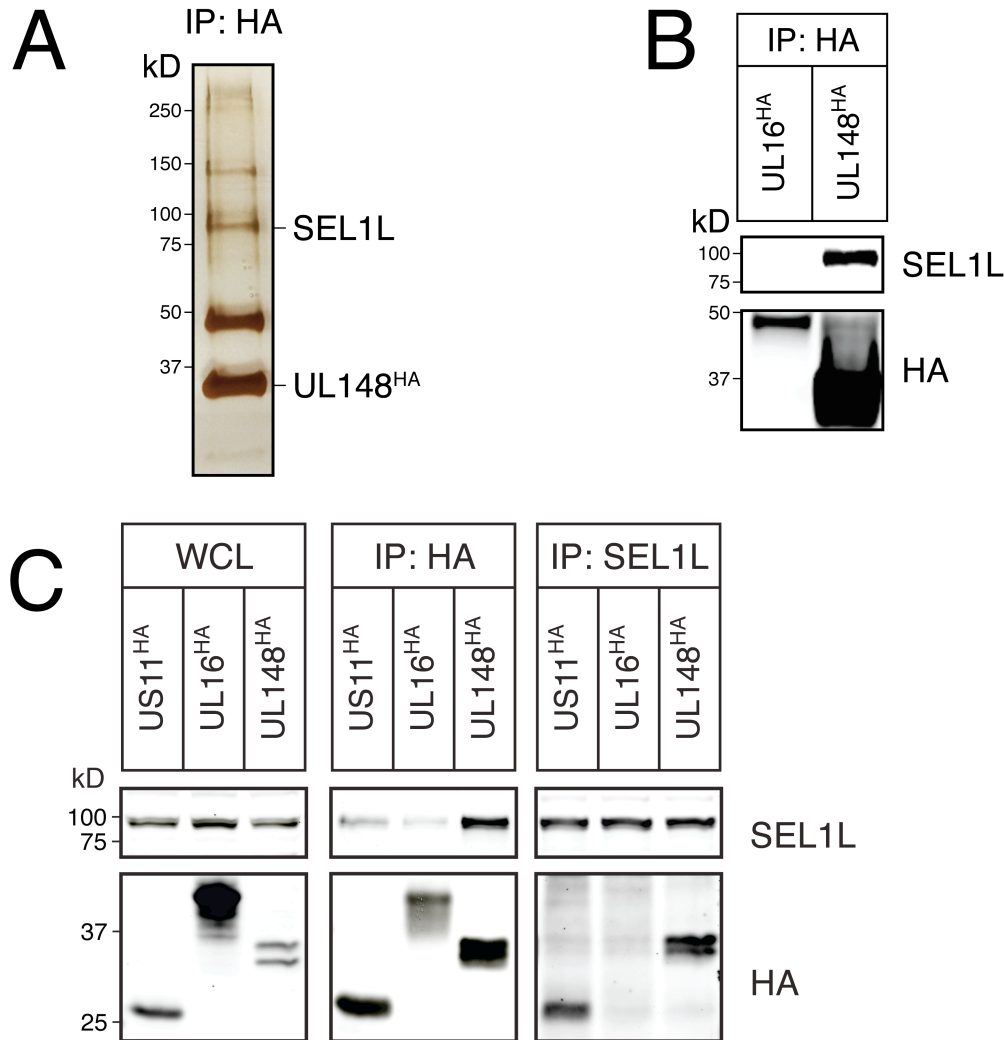

**FIG. 1. Viral tropism factor UL148 associates with ERAD adapter SEL1L during infection.** (A) Silver stain. Fibroblasts (HFF) infected with TB\_148<sup>HA</sup> were lysed at 72 hpi and subjected to HA-IP. Visible silver-stained bands were excised and analyzed by mass spectrometry. The putative association between UL148 and SEL1L was confirmed by HA-IP and western blot of UL148<sup>HA</sup> complexes from (B) infected cells or (C) 293T cells transfected with plasmids expressing the indicated HCMV ER-resident proteins.



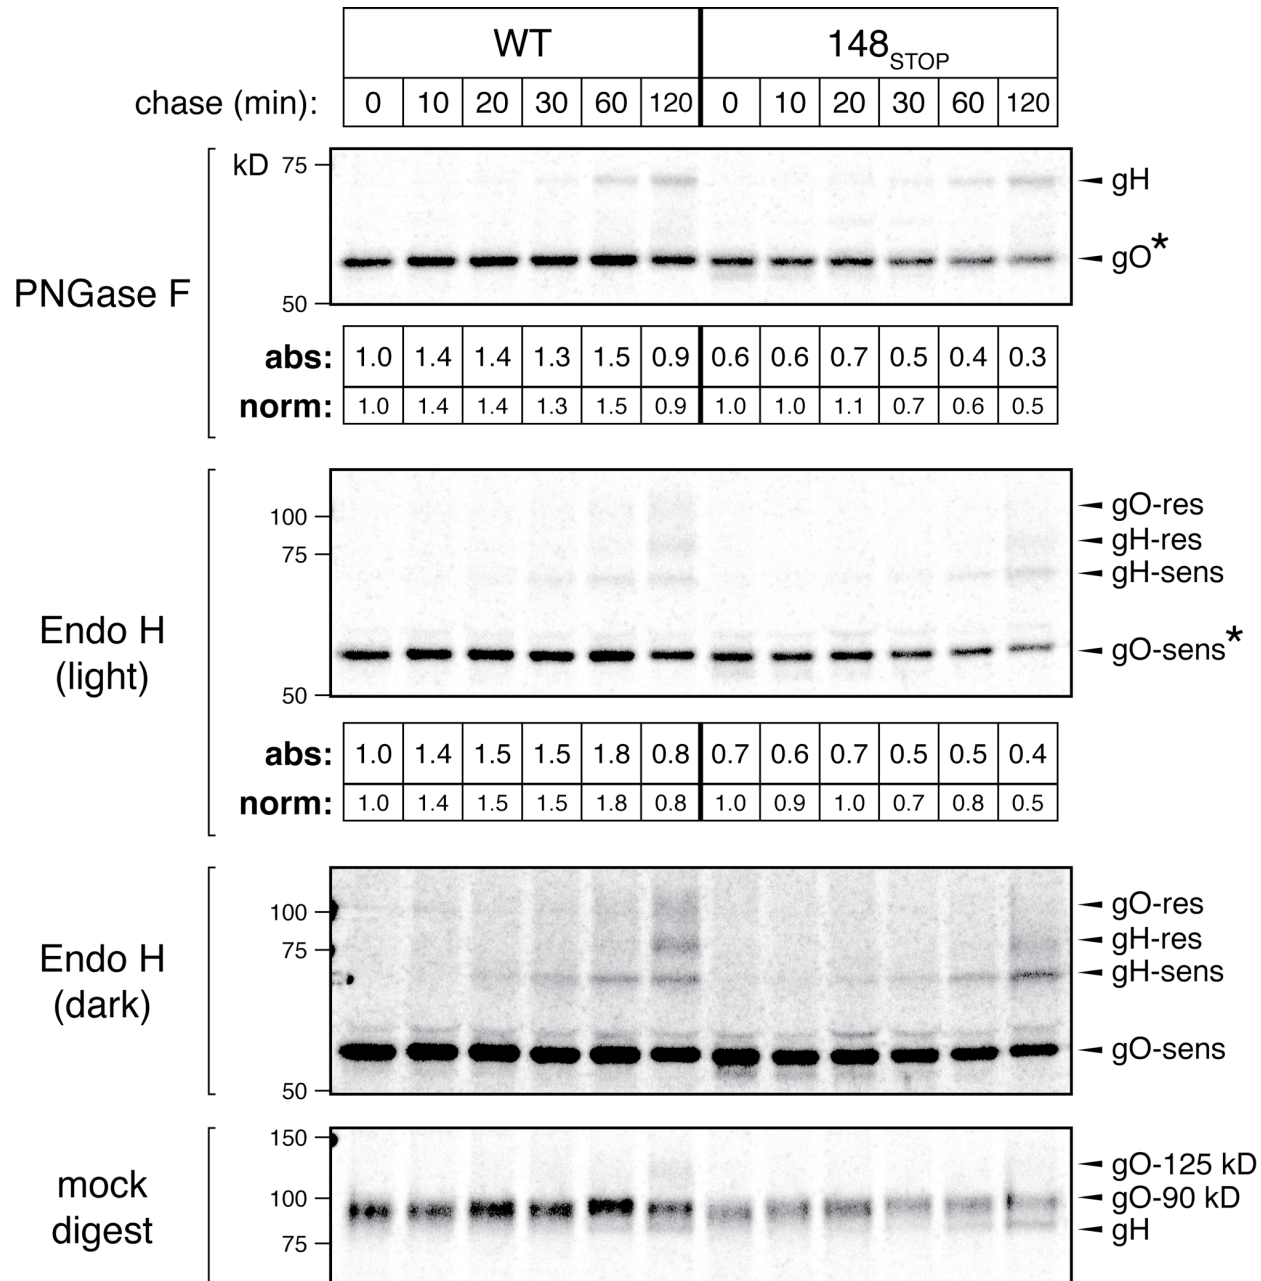

**FIG. 2. Pulse-chase analysis of gO during *UL148*-null HCMV infection.** Fibroblasts (HFFTs) were infected at an MOI of 1 TCID<sub>50</sub> per cell with TB40/E-derived recombinant TB\_gO-S expressing S-tagged gO (WT) or its *UL148*-null derivative, TB\_148<sub>STOP</sub>\_gO-S (148<sub>STOP</sub>). At 96 hpi, the cells were pulsed for 20 mins with 200  $\mu$ Ci/mL <sup>35</sup>S-Met/Cys and chased for the indicated times before lysis. Equal TCA-precipitable CPMs of each sample were subjected to S-AP, followed by endoglycosidase digestion and SDS-PAGE. The dried gel was exposed to a phosphor screen to produce an autoradiograph. The densities of the indicated gO bands (\*) were calculated and expressed either as absolute signal (“abs”) in relation to the WT/0 h band or as signal normalized (“norm”) across WT or *UL148*-null conditions relative to the respective 0 h band.

**FIG. 2. Accelerated gO decay in the absence of UL148.**

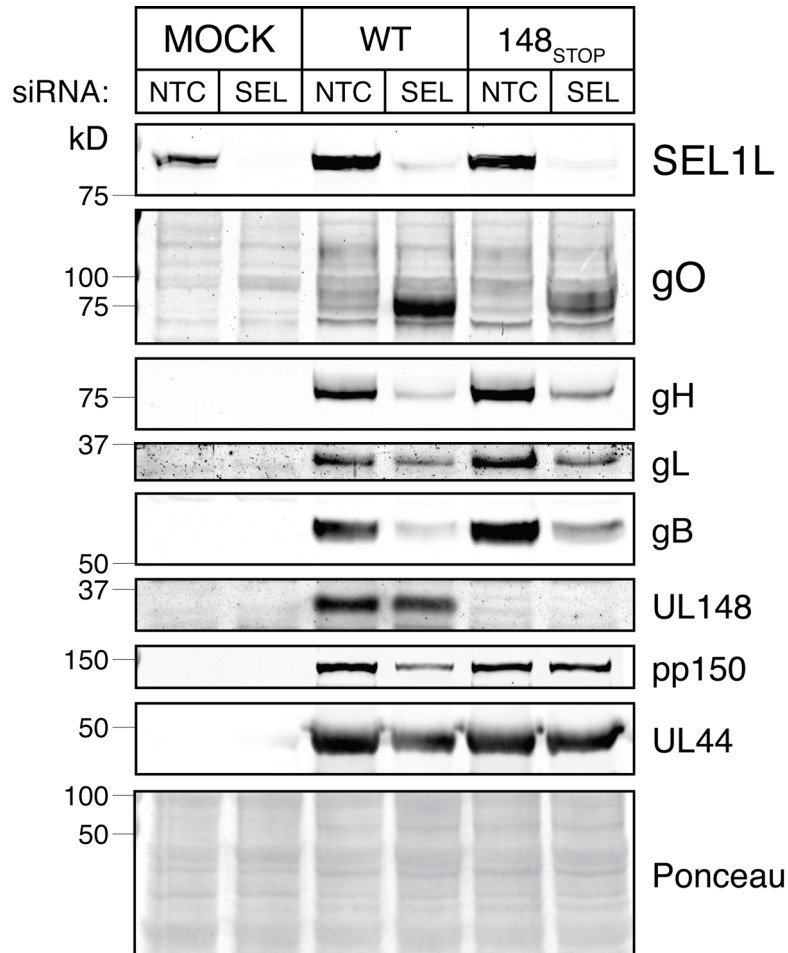

**FIG. 3. Depletion of SEL1L in HCMV-infected cells increases steady-state gO levels.** (A) Fibroblasts (HFFTs) were reverse-transfected with siRNA targeting SEL1L (SEL) or non-targeting control (NTC). At 48 h post transfection, the cells were infected with HCMV strain TB40/E (WT) or its *UL148*-null derivative, TB\_148<sub>STOP</sub> (148<sub>STOP</sub>) at an MOI of 1 TCID<sub>50</sub> per cell. HCMV glycoprotein levels at 96 hpi were analyzed by western blot.

**FIG. 3. SEL1L depletion increases gO levels.**

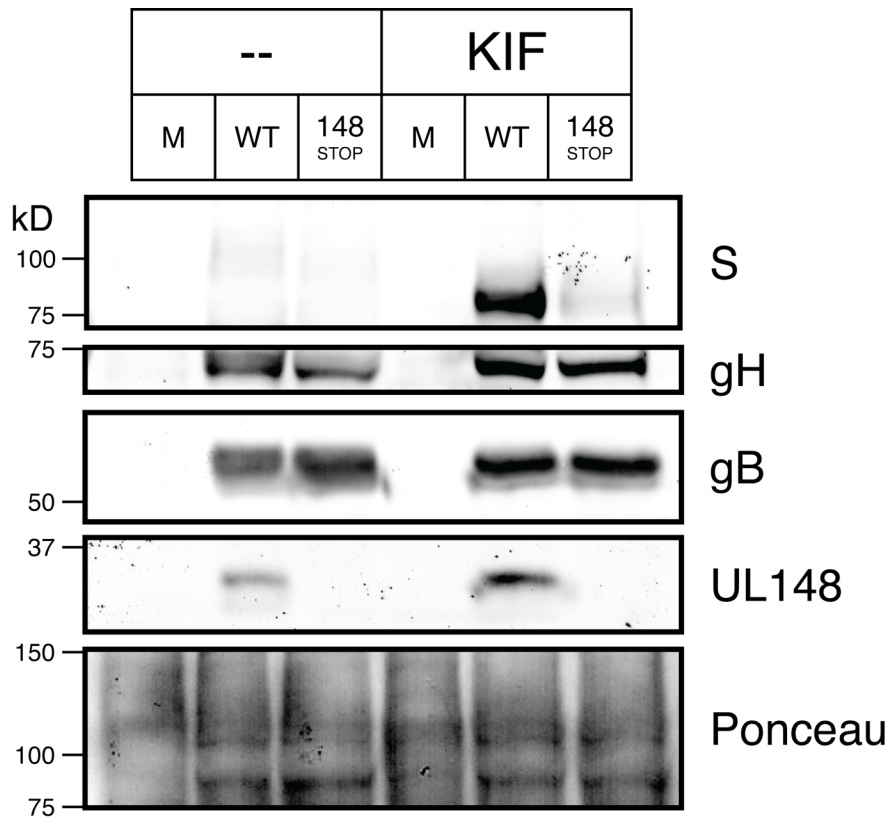

**FIG. 4. Treatment of HCMV-infected cells with an ERAD inhibitor increases steady-state gO levels.** Fibroblasts (HFFTs) were infected at an MOI of 1 TCID<sub>50</sub> per cell with TB\_gO-S (WT), TB\_148<sub>STOP</sub>\_gO-S (148<sub>STOP</sub>), or mock infection (M). Cells were treated with kifunensine (KIF) at 2.5  $\mu$ M or carrier-alone (water) at 72 hpi. At 96 hpi, HCMV glycoprotein levels were analyzed by western blot.

**FIG. 4. KIF treatment increases gO levels.**

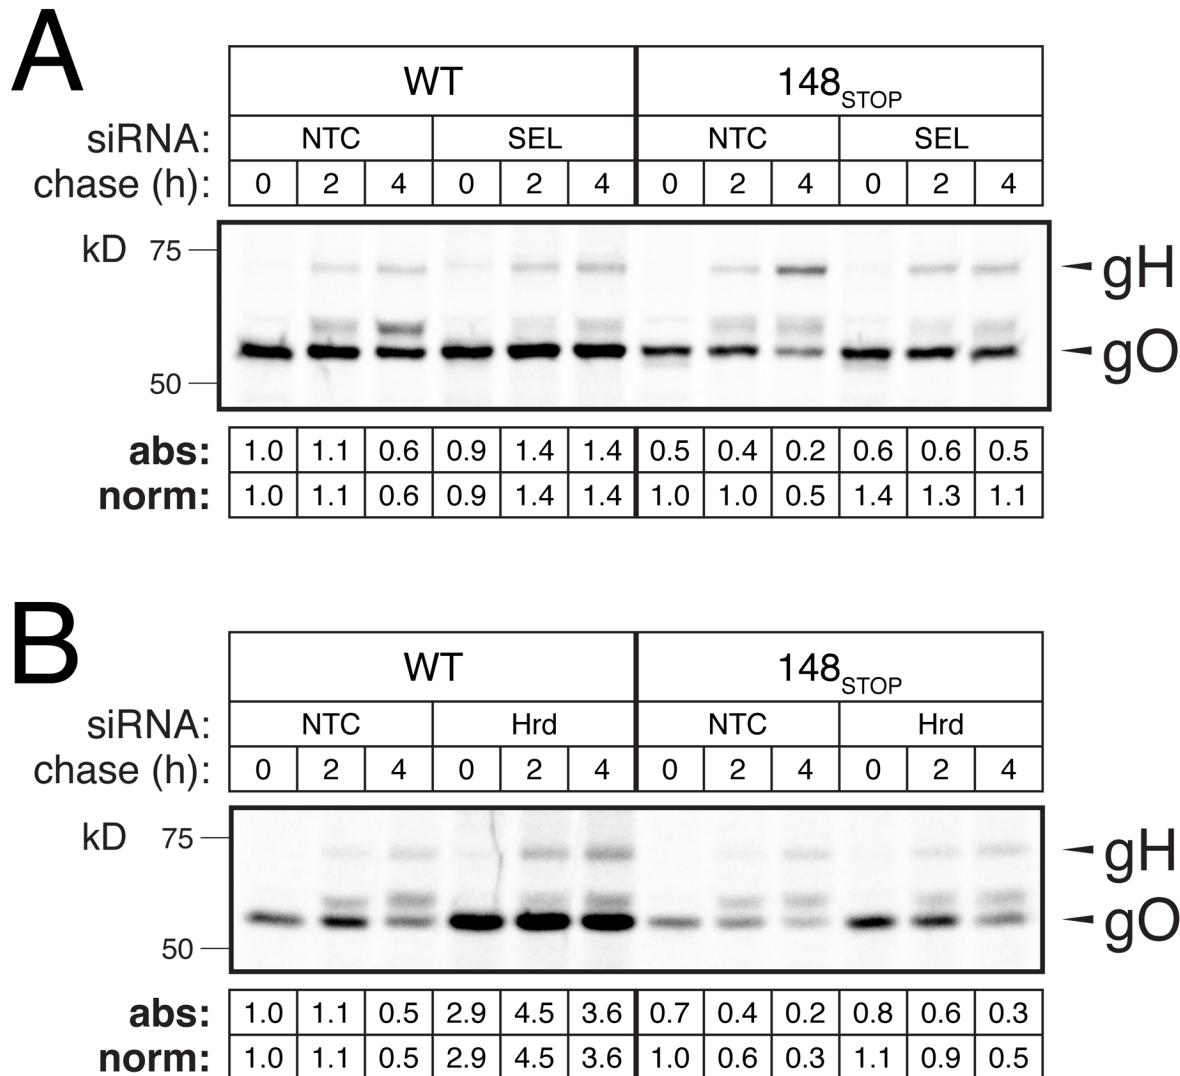

**FIG. 5. Depletion of SEL1L or Hrd1 in HCMV-infected cells stabilizes gO during WT and *UL148*-null infection.** Fibroblasts (HFFTs) were reverse-transfected with siRNAs targeting (A) SEL1L or (B) Hrd1. At 6 hpt, the cells were infected at an MOI of 1 TCID<sub>50</sub> per cell with TB\_gO-S (WT) or TB\_148<sub>STOP</sub>\_gO-S (148<sub>STOP</sub>). At 96 hpi, the cells were pulsed for 20 mins with 200  $\mu$ Ci/mL <sup>35</sup>S-Met/Cys and chased for the indicated times before lysis. Equal TCA-precipitable CPMs of each sample were subjected to S-AP, followed by PNGase F digestion to allow better resolution of gH and gO by SDS-PAGE. The dried gel was exposed to a phosphor screen to produce an autoradiograph. The densities of gO bands were calculated and expressed either as absolute signal (“abs”) in relation to the WT/NTC/0 h band or as normalized signal (“norm”) for each virus condition relative to the respective NTC/0 h band.

**FIG. 5. Depletion of SEL1L or Hrd1 stabilizes gO.**

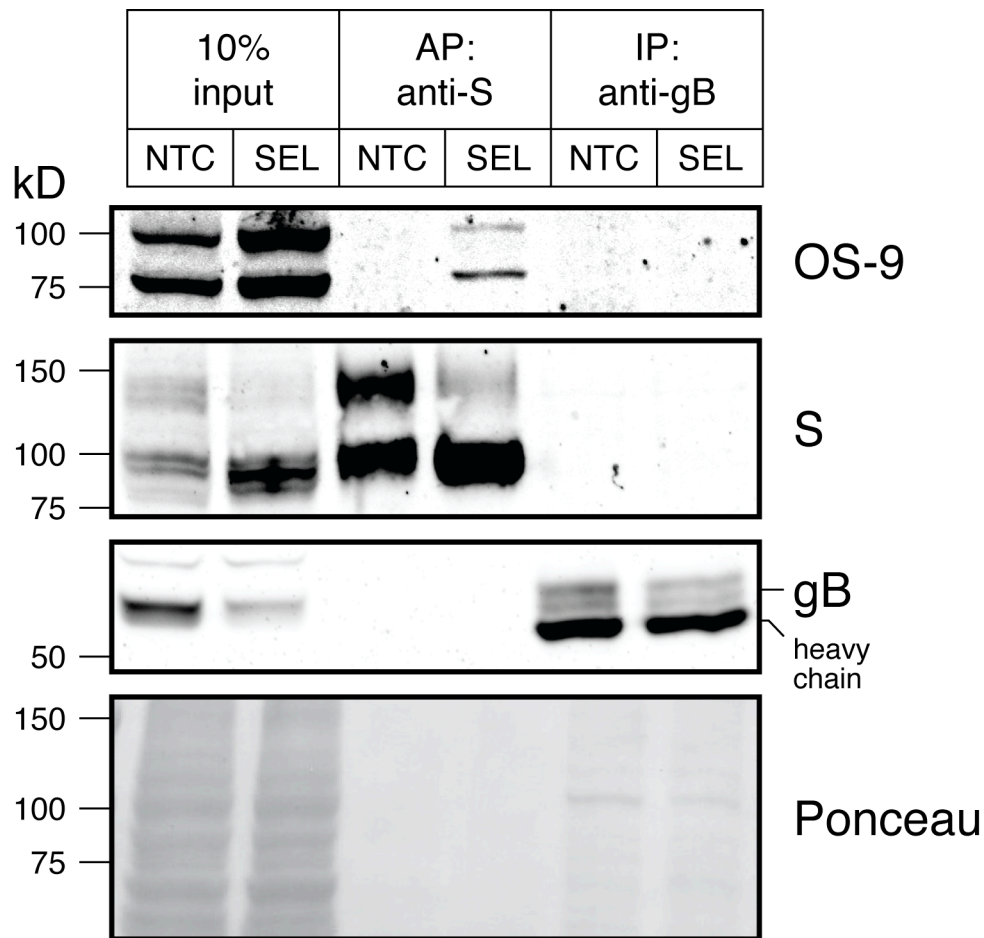

**FIG. 6. Depletion of SEL1L in HCMV-infected cells stabilizes a physical association between gO and ER lectin OS-9.** Fibroblasts (HFFTs) were reverse-transfected with siRNAs targeting SEL1L (SEL) or NTC. 48 h later, the cells were infected with TB\_gO-S at an MOI of 1 TCID<sub>50</sub> per cell. At 96 hpi, cell lysates were subjected to S-AP or gB-IP and analyzed by western blot.

**FIG. 6. gO associates with OS-9 during SEL1L KD.**

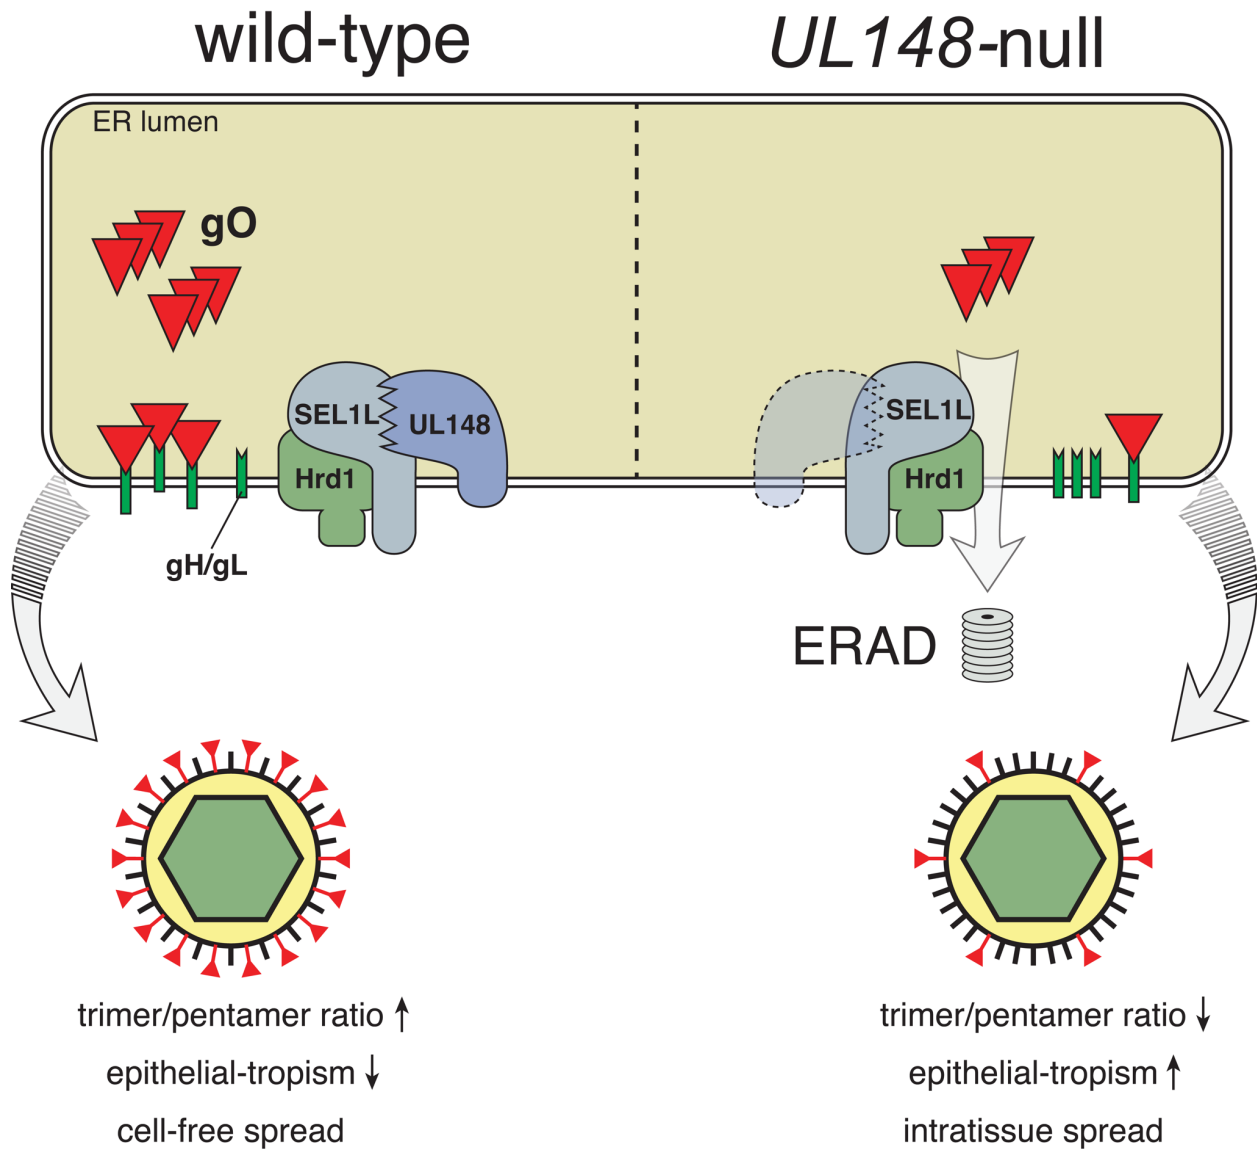

**FIG. 7. Model.** HCMV gO, either through unfavorable folding or inefficient assembly onto gH/gL, is targeted for destruction by ERAD, which is mediated by SEL1L/Hrd1. UL148, perhaps through a functional interaction with SEL1L, slows the degradation of gO.



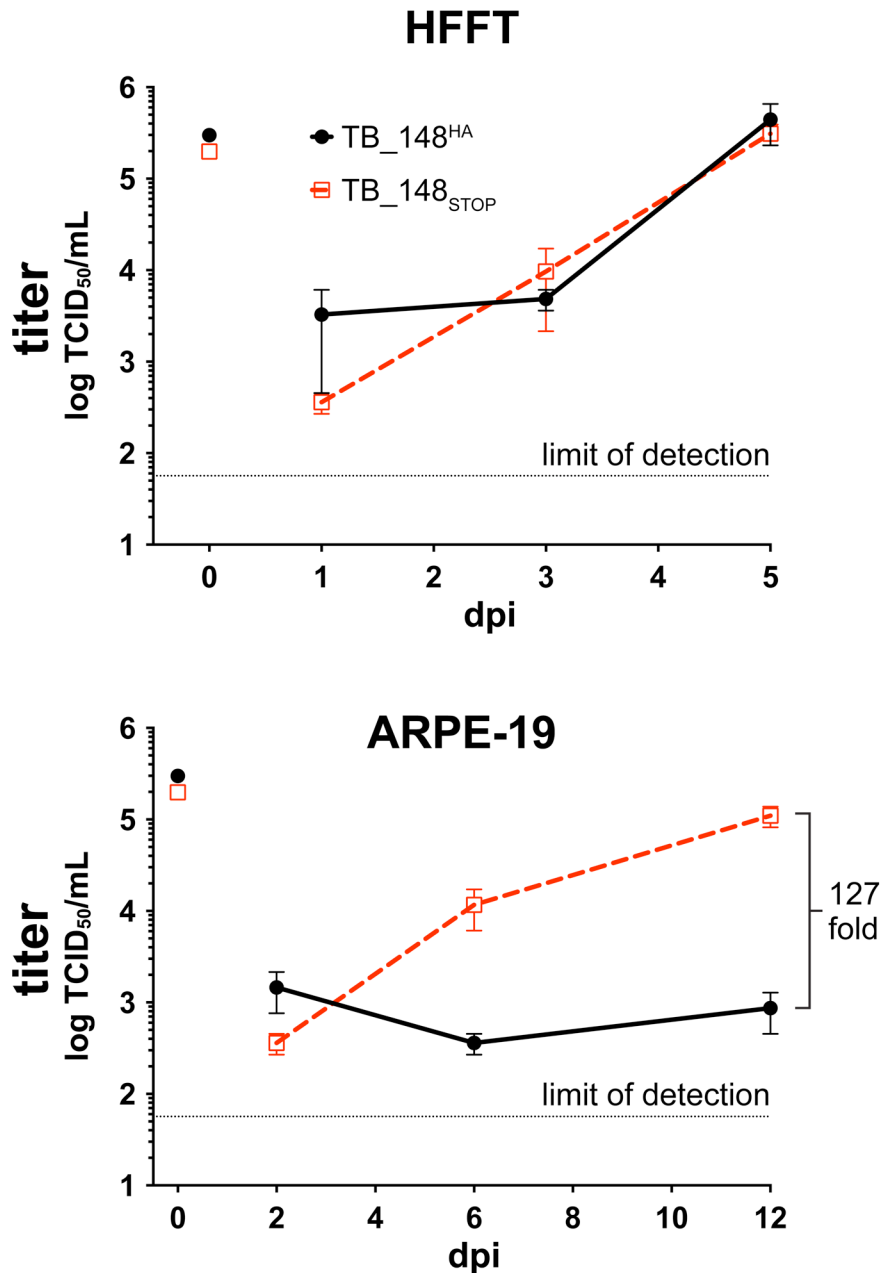

**FIG. S1. Growth kinetics of TB\_148<sup>HA</sup> and TB\_148<sup>STOP</sup> on HFFT and ARPE-19 cells.**

Fibroblasts (HFFT) and ARPE-19 cells were infected with TB\_148<sup>HA</sup> and TB\_148<sup>STOP</sup> at an MOI of 1 TCID<sub>50</sub> per cell according to virus stock titers calculated on HFFTs. Cell-free supernatants were collected at the indicated dpi and titered in parallel by TCID<sub>50</sub> assay on HFFTs. Back-titration of the original infectious inocula is depicted at the 0 dpi time-point. The dataset shown is one of two independent experiments. Error bars depict SEM calculated from duplicate infected wells.

**FIG. S1. TB\_148<sup>STOP</sup> growth kinetics.**

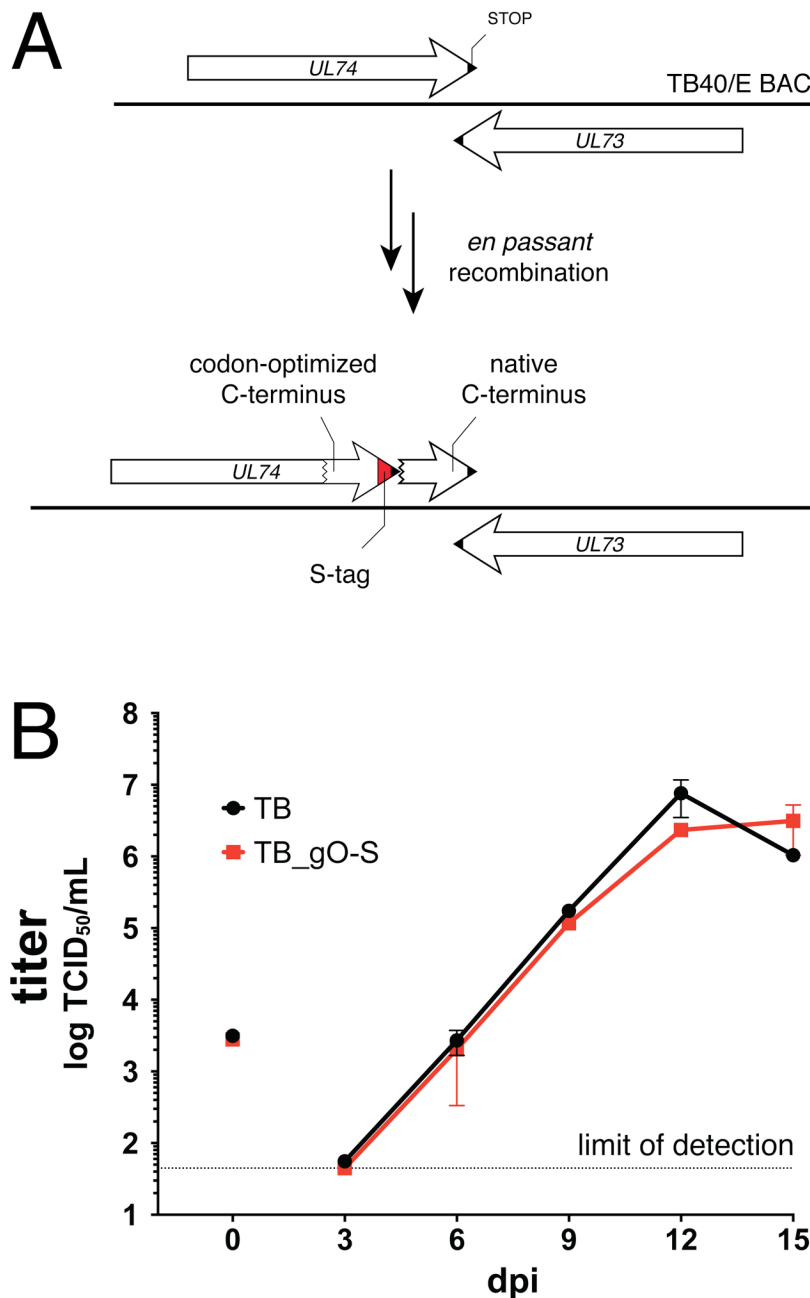

**FIG. S1. Construction and characterization of TB\_gO-S.** (A) Strategy for adding a C-terminal S-tag to the *UL74* (gO) ORF with minimal disruption of essential ORF *UL73*. (B) Multi-cycle growth kinetics of TB\_gO-S. Fibroblasts (HFFT) were infected with TB40/E (TB) or TB\_gO-S at an MOI of 0.005 TCID<sub>50</sub> per cell. Cell supernatants were collected at the indicated dpi and titered in parallel by TCID<sub>50</sub> assay. Back-titration of the original infectious inocula is depicted at the 0 dpi time-point. Error bars depict SEM calculated from duplicate infected wells. Dataset depicts one of two independent experiments.



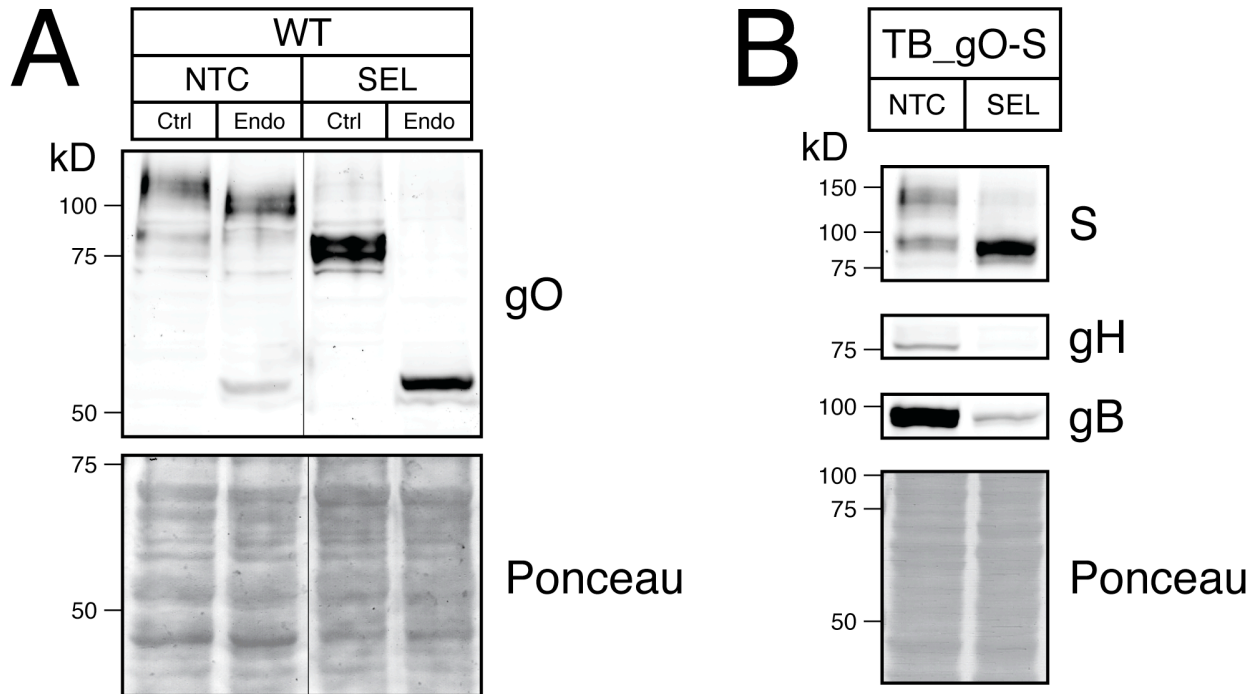

**FIG. S3. EndoH analysis and detection of gO levels during SEL1L knockdown (A)**

Lysates from TB\_WT-infected, siRNA-transfected cells (Fig. 3) were treated with EndoH or

mock-digest. Extraneous lanes from this blot have been cropped from the image. (B) S

western blot analysis of HCMV-infected cells depleted of SEL1L. Fibroblasts (HFFFT) were

reverse-transfected and infected as in Fig. 3 with TB\_gO-S. Lysates were harvested at 96 hpi

and analyzed by western blot.

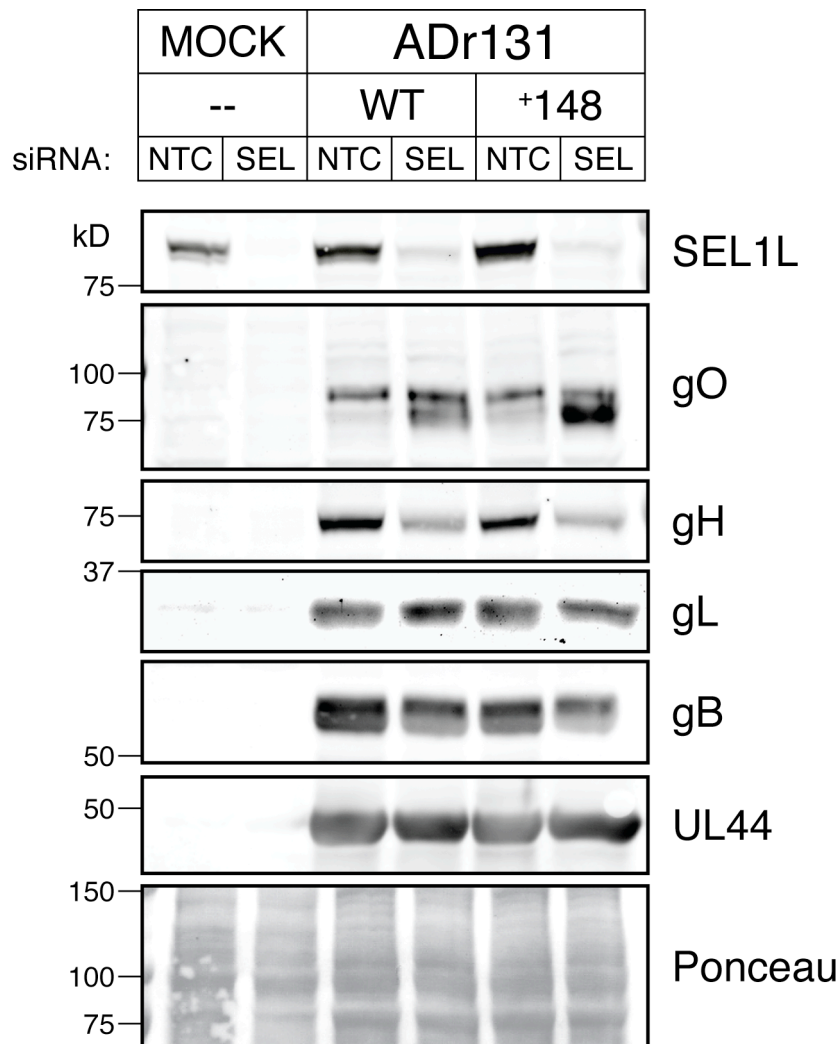

**FIG. S4. Depletion of SEL1L in HCMV strain AD169-infected cells recapitulates effects on HCMV glycoproteins.** Fibroblasts (HFFTs) were reverse-transfected and infected as in Fig. 3 with recombinant derivatives of HCMV strain AD169: ADr131 (WT) or ADr131\_148 (+148). Lysates were harvested at 96 hpi and analyzed by western blot.

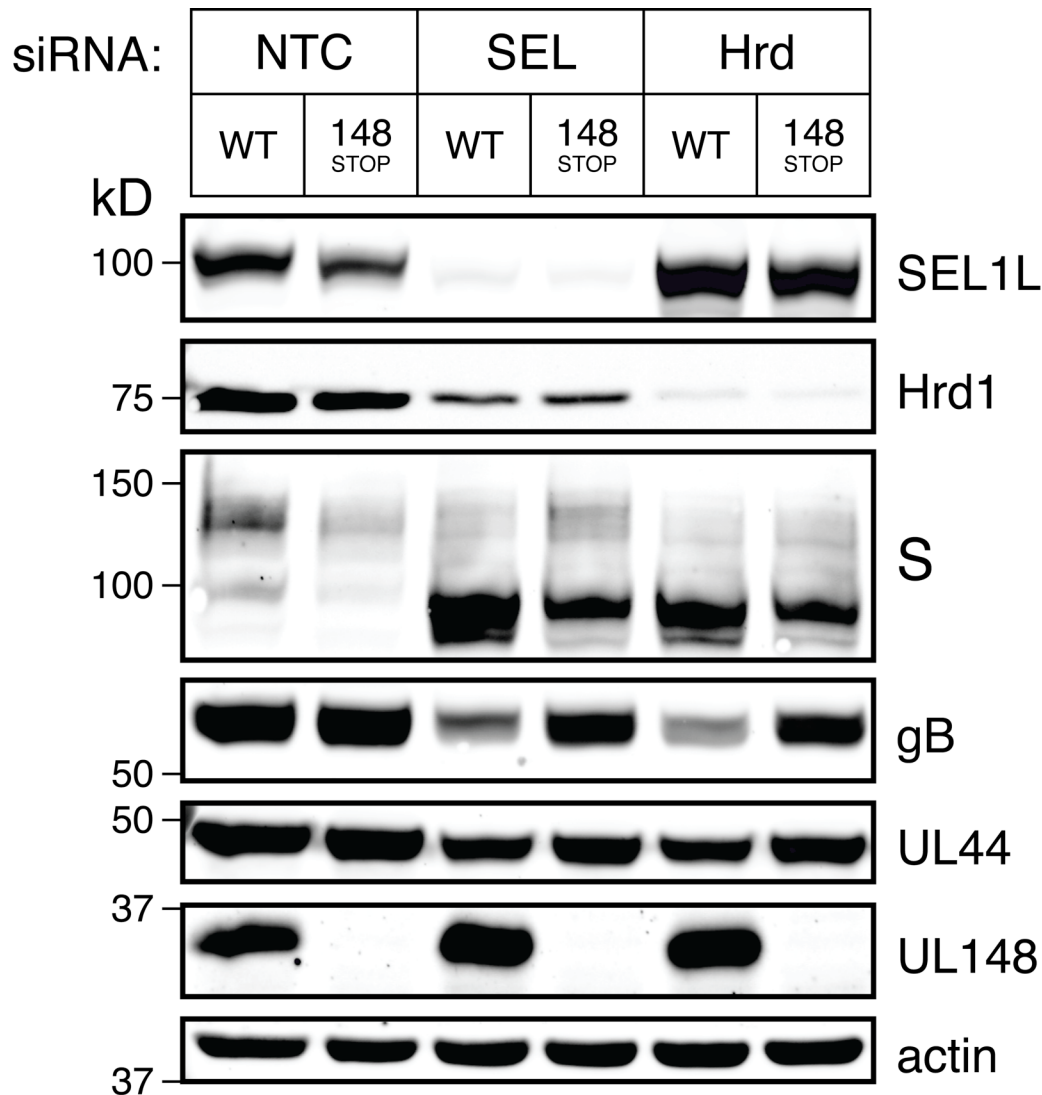

**FIG. S5. Hrd1 depletion in HCMV-infected cells increases gO levels.** Fibroblasts (HFFIT) were reverse-transfected siRNAs against NTC, SEL1L (SEL), or Hrd1 (Hrd) and infected with TB\_gO-S (WT) or TB\_148<sub>STOP</sub>\_gO-S (148<sub>STOP</sub>), as in Fig. 3. Lysates were harvested at 96 hpi and analyzed by western blot.

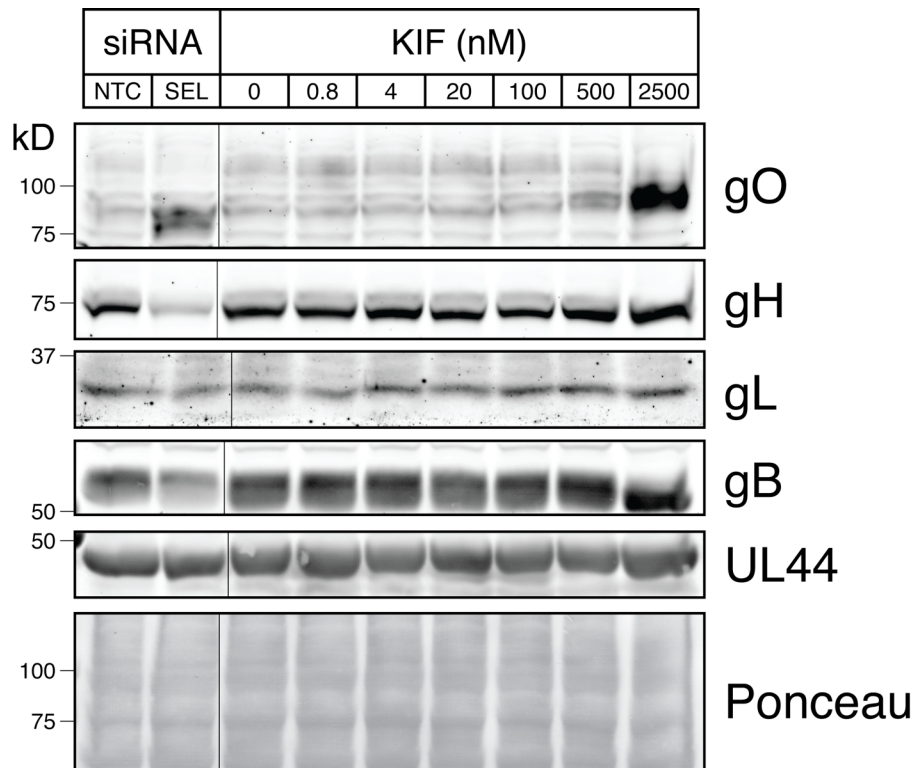

**FIG. S6. Dose-responsive effect of kifunensine on HCMV gO levels.** Fibroblasts (HFFT) were infected with HCMV strain TB40/E at an MOI of 1 TCID<sub>50</sub> per cell. At 72 hpi, fresh medium containing the indicated concentrations of KIF were added to the cells. Lysates were harvested at 96 hpi and analyzed by western blot. gO was visualized by antiserum against TB40/E gO. As a positive control for steady-state gO increase, cells were reverse-transfected with anti-SEL1L siRNAs as in Fig. 3, were infected, and analyzed in parallel. Extraneous lanes have been cropped out of the image. Concentrations above 2500 nM did not further increase gO levels (data not shown).

| Gene Symbol | Replicate 1 |       | Replicate 2 |       |
|-------------|-------------|-------|-------------|-------|
|             | Unique      | Total | Unique      | Total |
| ATP2A2      | 2           | 2     | 3           | 3     |
| CALU        | 4           | 4     | 2           | 2     |
| CAND1       | 3           | 3     | 7           | 7     |
| CD58        | 1           | 1     | 1           | 1     |
| CLPTM1      | 1           | 1     | 3           | 3     |
| COPB1       | 1           | 1     | 2           | 2     |
| COPG1       | 5           | 5     | 5           | 6     |
| CTNND1      | 4           | 4     | 5           | 5     |
| DDOST       | 5           | 5     | 4           | 4     |
| DHCR7       | 5           | 6     | 4           | 4     |
| DKK3        | 1           | 1     | 2           | 2     |
| DNAJB11     | 3           | 3     | 2           | 2     |
| DNAJC3      | 7           | 7     | 7           | 8     |
| ERLEC1      | 4           | 4     | 3           | 3     |
| ESYT2       | 2           | 2     | 2           | 2     |
| FAF2        | 2           | 2     | 1           | 2     |
| FAR1        | 3           | 3     | 4           | 4     |
| GFPT1       | 1           | 1     | 3           | 3     |
| HLA-A       | 2           | 2     | 1           | 1     |
| HSPA5       | 1           | 1     | 3           | 3     |
| LPCAT1      | 1           | 1     | 2           | 2     |
| MAGT1       | 2           | 2     | 2           | 2     |
| MLEC        | 2           | 2     | 2           | 2     |
| NCLN        | 5           | 5     | 10          | 10    |
| NCSTN       | 4           | 4     | 3           | 3     |
| NOMO1       | 9           | 10    | 9           | 10    |
| OS9         | 8           | 8     | 4           | 5     |
| PDIA3       | 4           | 4     | 1           | 1     |
| PSMD2       | 3           | 3     | 3           | 3     |
| PTPLAD1     | 2           | 2     | 2           | 2     |
| PTPN1       | 3           | 3     | 3           | 3     |
| RCN3        | 2           | 2     | 1           | 1     |
| RPN1        | 12          | 13    | 11          | 12    |
| RPTOR       | 2           | 2     | 3           | 3     |
| SDF4        | 2           | 2     | 2           | 2     |
| SEC61A1     | 4           | 4     | 5           | 5     |
| SEL1L       | 6           | 6     | 2           | 2     |
| SFXN3       | 4           | 4     | 7           | 7     |
| SIL1        | 2           | 2     | 5           | 5     |
| SNX8        | 3           | 3     | 2           | 2     |
| SPTLC1      | 2           | 2     | 1           | 1     |
| ST7L        | 1           | 1     | 3           | 3     |
| STT3A       | 2           | 2     | 6           | 6     |
| STT3B       | 5           | 5     | 7           | 7     |
| SURF4       | 6           | 6     | 4           | 4     |
| TMEM131     | 1           | 1     | 3           | 3     |
| TMEM59      | 2           | 2     | 3           | 3     |
| TMX4        | 1           | 1     | 2           | 2     |
| TTC13       | 4           | 4     | 4           | 4     |
| UBAP2L      | 1           | 1     | 4           | 4     |
| VCP         | 9           | 9     | 6           | 6     |

**TABLE S1. Mapping of peptide hits from UL148HA-IP eluates to human gene products.** Dataset depicts the unique and total hits mapping to the protein products of the human genes in the left column (HGNC Database)(1). Candidate genes were included in the list only if they appeared in both TB\_148<sup>HA</sup>-IP replicates and did not appear in the TB\_UL16<sup>HA</sup>-IP negative control.

1. Gray KA, Yates B, Seal RL, Wright MW, Bruford EA. 2015. Genenames.org: the HGNC resources in 2015. *Nucleic Acids Res* 43:D1079-85.



| Target                | Dharmacon pool ID | Individual siRNA ID | Target sequence     |
|-----------------------|-------------------|---------------------|---------------------|
| SEL1L                 | M-004885-01       | D-004885-02         | UAAGAAAGCUGCUGACAUG |
|                       |                   | D-004885-03         | GAAUUAAGCUCGGAGACUA |
|                       |                   | D-004885-04         | GGAGAGGAGUUCAAGUUA  |
|                       |                   | D-004885-05         | GAGAGGAGUUCAAGUUAU  |
| Hrd1                  | M-007090-01       | D-007090-01         | CAACAAGGCUGUGUACAUG |
|                       |                   | D-007090-02         | UGUCUGGCCUUCACCGUUU |
|                       |                   | D-007090-03         | GGAGAUGCCUGAGGAUGGA |
|                       |                   | D-007090-04         | CCAAGAGACUGCCCUGCAA |
| Non-targeting control | D-001206-14-05    | N/A                 | UAAGGCUAUGAAGAGAUAC |
|                       |                   |                     | AUGUAUUGGCCUGUAUUAG |
|                       |                   |                     | AUGAACGUGAAUUGCUCAA |
|                       |                   |                     | UGGUUUACAUGUCGACUAA |

**TABLE S3. Dharmacon SMARTpool siRNA sequences used in this study.**

## SUPPLEMENTAL METHODS AND SUPPLEMENTAL FIGURE LEGENDS.

### SUPPLEMENTAL METHODS.

#### Construction of recombinant viruses.

##### *TB40/E expressing HA-tagged UL16.*

TB40/E expressing HA-tagged UL16 (TB\_UL16<sup>HA</sup>) was constructed as follows: A PCR product containing an *ISceI* restriction site upstream of a kanamycin (KAN)-resistance cassette and 40bp flanks homologous to the native UL16 C-terminus was amplified using primers TB\_UL16HA\_FWD and TB\_UL16HA\_REV, and TB\_148\_ISceKan BAC DNA (1) as template. The gel-purified PCR product was electroporated into GS1783 *E. coli* carrying an infectious BAC clone of strain TB40/E BAC, TB40E-BAC4 (2), which was the generous gift of Christian Sinzger (University of Ulm, Germany). After isolating KAN-resistant colonies, the KAN expression cassette was “scarlessly” resolved by inducing expression of the *ISceI* homing endonuclease and Red recombinase. The final KAN-sensitive TB\_UL16<sup>HA</sup> recombinants were sequence-confirmed using primers TB\_UL16HA\_seq\_FWD and TB\_UL16HA\_seq\_REV.

##### *UL148-null recombinant TB\_148<sub>STOP</sub>.*

TB\_148bla was first constructed by replacing the *UL148* ORF of TB\_148<sup>HA</sup> with a beta-lactamase (*bla*) cassette PCR-amplified from plasmid pSP72 (Promega, Inc., Madison, WI) using primers TB\_148bla\_FWD and TB\_148bla\_REV. Plasmid pSP72-148stop-ISceKan was then constructed by Gibson assembly of: (i) gBlock 148stop\_1 (ii) gBlock 148stop\_2 (iii) *ISceI* cassette PCR-amplified from TB\_148\_ISceKan using



primers ISceKan\_FWD and ISceKan\_REV, and (iv) EcoRV-digested pSP72. The final plasmid was sequence-confirmed using primers SP6\_FWD and T7\_seq\_FWD. pSP72-148stop-ISceKan was digested by EcoRV to release a 2.1-kb fragment, which was recombined with TB\_148bla. Carbenicillin (CARB)-sensitive, KAN-resistant recombinants were resolved of the ISceKan cassette as described above to yield TB\_148<sub>STOP</sub>, which was sequence-confirmed using primers TB\_UL148\_seq\_FWD and TB\_UL148orf\_seq\_REV.

*TB40/E and TB\_148<sub>STOP</sub> expressing S-tagged gO.*

pSP72-UL74-FLAG-ISceKan was constructed by Gibson Assembly (3) of: (i) EcoRV-digested pSP72, (ii) gBlock TB\_UL74\_FLAG\_1, (iii) gBlock TB\_UL74\_FLAG\_2, and (iv) ISceKan PCR product described above and sequence-confirmed using primers SP6\_seq\_FWD and T7\_seq\_FWD. To construct pSP72-UL74-S-ISceKan, pSP72-UL74-FLAG-ISceKan was digested with PpfMI and BglII, and the 3.4-kb fragment was combined with gBlock TB\_UL74\_S-tag in Gibson assembly to yield pSP72-UL74-S-ISceKan, which was sequence-confirmed using primer AphAI\_3'\_FWD. pSP72-UL74-S-ISceKan was digested with EcoRV, and the 1.4-kb fragment recombined with the TB40/E or TB\_148<sub>STOP</sub> BAC. KAN-resistant recombinants were resolved of ISceKan as described above to yield TB\_gO-S and TB\_148<sub>STOP</sub>\_gO-S, which were sequence-confirmed using primers TB\_UL74\_Cterm\_FWD and TB\_UL74\_Cterm\_REV.

*ADr131 expressing UL148<sup>HA</sup> from TB40/E.*

The vestigial AD169rv *UL148* locus was replaced with *bla* cassette PCR-amplified from template TB\_148bla with primers AD\_RL13bla\_FWD and AD\_UL132bla\_REV as described above. The ISceKan-disrupted *UL148<sup>HA</sup>* locus from TB\_148\_ISceKan (1) was PCR-amplified using primers AD\_147A\_TB\_FWD and AD\_UL132\_TB\_REV, recombined in GS1783 *E. coli* with ADr131\_148bla, and resolved to yield ADr131\_148, which was sequence-confirmed using primers AD\_148TB\_seq\_FWD and AD\_148TB\_seq\_REV.

### **Plasmid construction.**

*pLenti PGK Neo hTERT*. pLenti PGK Neo hTERT was constructed as follows. The *hTERT* ORF was released from pBABE Hygro hTERT (Addgene #1773) by EcoRI/Sall digestion and ligated to XhoI/Sall-digested pENTR1A-no-ccDB (Addgene #17398) to yield pENTR1A hTERT. The *hTERT* ORF was transferred by Gateway cloning to pLenti PGK Neo DEST (Addgene #19067) using LR Clonase II (ThermoFisher #11791-020), resulting in pLenti PGK Neo hTERT.

*UL148<sup>HA</sup>, US11<sup>HA</sup>, and UL16<sup>HA</sup> expression plasmids*. pEF1α *UL148<sup>HA</sup>* was constructed as follows. The *UL148<sup>HA</sup>* ORF was amplified from TB\_148<sup>HA</sup> with primers UL148HA\_subclone\_FWD and UL148HA\_subclone\_REV, digested with BamHI /EcoRI, and ligated into pEF1α V5 His C (Invitrogen). pEF1α *US11<sup>HA</sup>* and pEF1α *UL16<sup>HA</sup>* were constructed by Gibson assembly of EcoRV-digested pEF1α V5 His C (Invitrogen) with

gBlock US11HA\_opt or gBlock UL16HA\_opt, respectively. Primers T7\_seq\_FWD and BGH\_REV were used to sequence-confirm these constructs.

### **hTERT lentivirus production and transduction.**

$5 \times 10^5$  293T cells were co-transfected with pLenti PGK Neo hTERT, psPAX2 (Addgene #12260), and pMD2.G (Addgene #12259) using Mirus Transit-293 reagent according to the manufacturer's instructions. Lentiviral supernatant was collected at 2 and 3 d post-transfection,  $0.45 \mu\text{m}$ -filtered, supplemented with polybrene ( $8 \mu\text{g}/\text{mL}$ ), and added to subconfluent HFFs. The next day, inocula were removed and cells were washed three times with DPBS. Starting at 4 d post-transduction, cells were serially-passaged in medium containing  $500 \mu\text{g}/\text{mL}$  G418. The G418-resistant transduced HFFs that continued to undergo population doublings after control cells senesced were designated hTERT-immortalized HFFs.

### **Processing of samples for mass spectrometry analysis.**

Bands were cut into roughly one cubic millimeter pieces and subjected to an in-gel trypsin digest(4). In brief, gel pieces were dehydrated by soaking in acetonitrile for 10 mins, followed by acetonitrile removal and drying by speed-vac. Gel pieces were rehydrated by addition of 50 mM ammonium bicarbonate containing  $12.5 \text{ ng}/\mu\text{L}$  sequencing-grade trypsin (Promega) for 45 min at  $4^\circ\text{C}$ . Excess trypsin solution was removed, and ammonium bicarbonate solution was added to barely cover the gel pieces for overnight incubation at  $37^\circ\text{C}$ . Peptides were extracted with 50% acetonitrile/1%

formic acid solution, and extracts were dried for 1 hr in a speed-vac. Dried samples were stored at 4°C until analysis. Just before analysis, samples were reconstituted in 5-10 µL of 2.5% acetonitrile/0.1% formic acid solution (Solvent A).

For preparation of a nano-scale reverse-phase HPLC capillary column, a flame-drawn tip was used to pack 2.6 µm C18 silica beads into a 100 µm (inner diameter) × 30 cm fused silica capillary (5). The column was equilibrated with Solvent A, and a Famos auto sampler (LC Packings, San Francisco, CA) loaded each sample onto the column to allow formation of a gradient. Peptides were then eluted with increasing concentrations of 97.5% acetonitrile/0.1% formic acid.

## SUPPLEMENTAL FIGURE LEGENDS

**FIG. S1. Construction and characterization of TB\_gO-S.** (A) Strategy for adding a C-terminal S-tag to the *UL74* (gO) ORF with minimal disruption of essential ORF *UL73*.

(B) Multi-cycle growth kinetics of TB\_gO-S. Fibroblasts (HFFT) were infected with TB40/E (TB) or TB\_gO-S at an MOI of 0.005 TCID<sub>50</sub> per cell. Cell supernatants were collected at the indicated dpi and titered in parallel by TCID<sub>50</sub> assay. Back-titration of the original infectious inocula is depicted at the 0 dpi time-point. Error bars depict SEM calculated from duplicate infected wells. Dataset depicts one of two independent experiments.

**FIG. S2. Growth kinetics of TB\_148<sup>HA</sup> and TB\_148<sup>STOP</sup> on HFFT and ARPE-19 cells.**

Fibroblasts (HFFT) and ARPE-19 cells were infected with TB\_148<sup>HA</sup> and TB\_148<sup>STOP</sup> at an MOI of 1 TCID<sub>50</sub> per cell according to virus stock titers calculated on HFFTs. Cell-free supernatants were collected at the indicated dpi and titered in parallel by TCID<sub>50</sub> assay on HFFTs. Back-titration of the original infectious inocula is depicted at the 0 dpi time-point. The dataset shown is one of two independent experiments. Error bars depict SEM calculated from duplicate infected wells.

**FIG. S3. EndoH analysis and detection of gO levels during SEL1L knockdown (A)**

Lysates from TB\_WT-infected, siRNA-transfected cells (Fig. 3) were treated with EndoH or mock-digest. Extraneous lanes from this blot have been cropped from the image. (B) S western blot analysis of HCMV-infected cells depleted of SEL1L. Fibroblasts (HFFT) were reverse-transfected and infected as in Fig. 3 with TB\_gO-S. Lysates were harvested at 96 hpi and analyzed by western blot.

**FIG. S4. Depletion of SEL1L in HCMV strain AD169-infected cells recapitulates**

**effects on HCMV glycoproteins.** Fibroblasts (HFFT) were reverse-transfected and infected as in Fig. 3 with recombinant derivatives of HCMV strain AD169: ADr131 (WT) or ADr131\_148 (+148). Lysates were harvested at 96 hpi and analyzed by western blot.

**FIG. S5. Hrd1 depletion in HCMV-infected cells increases gO levels.**

Fibroblasts (HFFT) were reverse-transfected siRNAs against NTC, SEL1L (SEL), or Hrd1 (Hrd) and infected with TB\_gO-S (WT) or TB\_148<sub>STOP</sub>\_gO-S (148<sub>STOP</sub>), as in Fig. 3. Lysates were harvested at 96 hpi and analyzed by western blot.

**FIG. S6. Dose-responsive effect of kifunensine on HCMV gO levels.**

Fibroblasts (HFFT) were infected with HCMV strain TB40/E at an MOI of 1 TCID<sub>50</sub> per cell. At 72 hpi, fresh medium containing the indicated concentrations of KIF were added to the cells. Lysates were harvested at 96 hpi and analyzed by western blot. gO was visualized by antiserum against TB40/E gO. As a positive control for steady-state gO

increase, cells were reverse-transfected with anti-SEL1L siRNAs as in Fig. 3, were infected, and analyzed in parallel. Extraneous lanes have been cropped out of the image. Concentrations above 2500 nM did not further increase gO levels (data not shown).

**TABLE S1. Mapping of peptide hits from UL148HA-IP eluates to human gene products.** Dataset depicts the unique and total hits mapping to the protein products of the human genes in the left column (HGNC Database)(6). Candidate genes were included in the list only if they appeared in both TB\_148<sup>HA</sup>-IP replicates and did not appear in the TB\_UL16<sup>HA</sup>-IP negative control.

**TABLE S2. Synthetic DNAs used in the construction and sequence-confirmation of BAC recombinants and plasmids.**

**TABLE S3. Dharmacon SMARTpool siRNA sequences used in this study.**

## SUPPLEMENTAL REFERENCES

1. Li G, Nguyen CC, Ryckman BJ, Britt WJ, Kamil JP. 2015. A viral regulator of glycoprotein complexes contributes to human cytomegalovirus cell tropism. *Proc Natl Acad Sci U S A* 112:4471-6.
2. Sinzger C, Hahn G, Digel M, Katona R, Sampaio KL, Messerle M, Hengel H, Koszinowski U, Brune W, Adler B. 2008. Cloning and sequencing of a highly productive, endotheliotropic virus strain derived from human cytomegalovirus TB40/E. *J Gen Virol* 89:359-68.
3. Gibson DG, Young L, Chuang RY, Venter JC, Hutchison CA, 3rd, Smith HO. 2009. Enzymatic assembly of DNA molecules up to several hundred kilobases. *Nat Methods* 6:343-5.
4. Shevchenko A, Jensen ON, Podtelejnikov AV, Sagliocco F, Wilm M, Vorm O, Mortensen P, Shevchenko A, Boucherie H, Mann M. 1996. Linking genome and proteome by mass spectrometry: large-scale identification of yeast proteins from two dimensional gels. *Proc Natl Acad Sci U S A* 93:14440-5.
5. Peng J, Gygi SP. 2001. Proteomics: the move to mixtures. *J Mass Spectrom* 36:1083-91.
6. Gray KA, Yates B, Seal RL, Wright MW, Bruford EA. 2015. Genenames.org: the HGNC resources in 2015. *Nucleic Acids Res* 43:D1079-85.
